# Supplementary material for: Transcription Factor EB Activation Rescues Advanced αB‐Crystallin Mutation‐Induced Cardiomyopathy by Normalizing Desmin Localization
Source: PubMed Central journal article supplement — J Am Heart Assoc. 2019 Feb 16;8(4):e010866. doi: 10.1161/JAHA.118.010866 (PMC6405666; doi:10.1161/jaha.118.010866), 2019-02-16
Supplement: JAH3-8-e010866-s001.pdf [file JAH3-8-e010866-s001.pdf]

# **SUPPLEMENTAL MATERIAL**

## Data S1.

### Supplementary Methods:

#### Methods

*Fasting studies in mice:* Mice were housed in groups of up to n = 5 mice/cage and fed standard chow (Lab Diet, 5053; providing 3.4 Kcal/g with 62.1% Kcal derived from carbohydrates, 13.2% from fats, and 24.6% from protein) on a 6:00 PM to 6:00 AM dark-light cycle. Intermittent fasting was performed with total food deprivation and ad libitum access to water while mice were housed on a cedar pine chip bedding from 12:00 PM to 12:00 PM of the following day to implement alternate periods of 24 h fasting and feeding, with change in bedding (AL indicates fed ad libitum and IF indicates that animals were provided access to food every other day).<sup>1</sup> Non-fasted control mice were simultaneously provided fresh food with change in bedding. Terminal studies on mice were initiated between 8:00 to 10:00 AM after an overnight period of feeding (i.e., on a fed day). For fasting studies to determine the effects on HSPB8 transcript levels in the heart, mice were fasted for various durations beginning at 6:00 PM (the onset of the dark cycle during which mice typically feed).

*Echocardiography:* Echocardiography was performed using a Vevo 2100 Imaging System (VisualSonics, Toronto, Canada) equipped with a 30 MHz linear-array transducer according slight modifications of previously published methods.<sup>2,3</sup> Briefly, mice were anesthetized using 0.1 g/kg IP Avertin (2,2,2-Tribromoethanol, Sigma-Aldrich, St. Louis, MO). Cardiac images were obtained by a handheld technique. Parasternal long- and short-axis images of the LV were used to guide acquisition of M-mode images at the papillary muscle level. Digitally recorded images were used to measure LV wall thickness (LV posterior wall, LVPW; interventricular septum, IVS) and chamber diameter (LVEDD) in end-diastole (d) and in end-systole (s). These measurements were used to calculate LV fractional shortening ( $LVFS = (100 \times LVEDD - LVESD) / LVEDD$ ) and LV mass ( $LVM = [(LVPWd + IVSd + LVIDd)^3 - LVIDd^3] \times 1.04$ ).

*Studies with neonatal rat cardiac myocytes (NRCMs):* Primary cultures of neonatal rat cardiac myocytes were prepared as we have previously described.<sup>4</sup> Hearts were harvested from one-day old neonatal rats, and the ventricles were subjected to trypsin (Invitrogen) digestion in a final concentration of 100 µg/ml in HBSS for 16 – 18 hours at 4°C after removal of the atria. Collagenase digestion (type II collagenase; 150 U/ml; Worthington) was conducted at 37 ° C for 45 min. The mixture of cells was plated for 2 h in flasks to exclude fibroblasts. The remaining non-adherent cardiomyocytes were seeded on collagen-coated four-well chamber slides (Laboratory Tek) at a density of 10<sup>5</sup> cells per square cm. On the 2nd day the culture medium was changed to the Rat Cardiomyocyte Culture Medium (Cell applications INC, cat#R313-500) for at 3-5 days prior to desmin staining. NRCMs were treated with Bafilomycin A1 (BfA, Fisher scientific, cat#NC9686929): 200nM for 2 hours prior to harvest to assess autophagic flux, in vitro.

*Isolation of soluble and insoluble fractions:* The protocol described by Tannous et al was modified for this assay.<sup>5</sup> Heart tissue was mechanically homogenized in 500-1000ul (depending on size of tissue) of homogenization buffer (0.3 M KCl, 0.1 M KH<sub>2</sub>PO<sub>4</sub>, 50 mM K<sub>2</sub>HPO<sub>4</sub>, 10 mM EDTA, 4 mM Na Orthovanadate, 100 mM NaF, Protease inhibitor, pH to 6.5). NRCMs were similarly homogenized with 20 strokes on ice with a Dounce homogenizer. Homogenized samples were passed through mesh basket on ice, followed by collection of the lysate run-through which was incubated on ice for 30 minutes. A known volume of the sample was transferred to another Eppendorf tube and 10% NP-40 was added to for a final concentration of 1% NP-40. Samples were then incubated on ice for 30 minutes, and spun at 13,000 rpm for 15 minutes, 4°C. Supernatant was collected as soluble fraction. The pellet was washed 3 times with cold PBS (following addition of 1ml PBS to each pellet, and spin down at 13,000 rpm for 10 minutes) followed by resuspension in 1% SDS, 10mM Tris buffer to generate the insoluble fraction.

*Quantitation of desmin in aggregates by immuno-fluorescence:* At least 10 images were obtained per heart from desmin stained whole heart sections of the left ventricle. 20X images were obtained with a 3x

zoom factor using a Zeiss Fluorescent microscope. After acquisition, images were converted into a JPG format using the Zeiss Zen software. Each image was analyzed using ImageJ software with a predetermined size threshold to exclude noise to obtain area of aggregates per section, depicted as a percentage of the total visualized area.

*Puromycin labeling to assess protein synthesis by the SunSET technique:* We utilized the SunSET technique to assess protein synthesis in the mouse heart.<sup>6</sup> Mice were injected with puromycin (Enzo Life Sciences, Inc. cat#BML-GR312-0250) at a dose of 0.04  $\mu\text{mol/g}$  body mass, i.p. 30 minutes prior to sacrifice. Cardiac tissue was homogenized in buffer I (50mM Tris HCl pH7.4, 2.5mM EDTA, 25mM NaCl, 0.2% NP 40, 10mM EGTA, 20mM NaFl, 25mM Na<sub>4</sub>O<sub>7</sub>P<sub>2</sub>, 2mM Na<sub>3</sub>VO<sub>4</sub> with added Halt Protease and Phosphatase Inhibitor<sup>TM</sup>, Thermo Scientific, cat# 78442) and subjected to SDS-PAGE electrophoresis. Anti-puromycin antibody (clone 12D10, cat# MABE343 from Millipore) was employed for immuno-detection of incorporated puromycin.

**Table S1. List of primers for quantitative PCR analysis.**

| <b>Rat Genes</b>   | <b>Forward (5'-3')</b>  | <b>Reverse (5'-3')</b>     |
|--------------------|-------------------------|----------------------------|
| <i>HSP90aa1</i>    | GCTTTCAGAGCTGTTGAGATAC  | AAAGGCTGAGTTAGCAACCTGG     |
| <i>HSPB1</i>       | CGGCAACTCAGCAGCGGTGTCT  | CATGTTTCATCCTGCCTTTCTTCGTG |
| <i>HSPB8</i>       | CCGGAAGAACTGATGGTAAAGAC | CCTCTGGAGAAAGTGAGGCAAATAC  |
| <i>CryAB</i>       | CTTCTACCTTCGGCCACCCTC   | GCACCTCAATCACGTCTCCC       |
| <i>HSPBAP1</i>     | GTACATTGTGGATCGGATCCCT  | GGAAAGGTGTATCTTCAGGAGG     |
| <i>HSP70</i>       | ACGAGGGTCTCAAGGGCAAG    | CTCTTTCTCAGCCAGCGTGTTAG    |
| <i>RPL32</i>       | CCTCTGGTGAAGCCCAAGATC   | TCTGGGTTTCCGCCAGTTT        |
|                    |                         |                            |
| <b>Mouse Genes</b> | <b>Forward (5'-3')</b>  | <b>Reverse (5'-3')</b>     |
| <i>Desmin</i>      | GCGGCTAAGAACATCTCTGAGG  | ATCTCGCAGGTGTAGGACTGGA     |
| <i>RPL32</i>       | CCTCTGGTGAAGCCCAAGATC   | TCTGGGTTTCCGCCAGTTT        |

**Table S2. Evaluation of cardiac function by m-mode echocardiography in wild type ad lib fed mice and *Myh6CryABR120G* mice - either treated with ad lib feeding or intermittent fasting. Data shown is Mean  $\pm$  SEM.**

|                       | <b>Wild type</b><br>(n=5) | <b><i>Myh6CryABR120G</i> ad lib</b><br>(n=7) | <b><i>Myh6CryABR120G</i> IF</b><br>(n=7) |
|-----------------------|---------------------------|----------------------------------------------|------------------------------------------|
| <b>LVEDD</b> (mm)     | 3.3 $\pm$ 0.1             | 4.2 $\pm$ 0.1*                               | 3.7 $\pm$ 0.1*#                          |
| <b>LVESD</b> (mm)     | 1.7 $\pm$ 0.1             | 3.2 $\pm$ 0.1*                               | 2.5 $\pm$ 0.2*#                          |
| <b>FS</b> (%)         | 49.6 $\pm$ 2.2            | 24.1 $\pm$ 1.5*                              | 32.6 $\pm$ 3.9*#                         |
| <b>IVSd</b> (mm)      | 0.70 $\pm$ 0.04           | 1.01 $\pm$ 0.06*                             | 0.92 $\pm$ 0.03*                         |
| <b>PWTd</b> (mm)      | 0.71 $\pm$ 0.03           | 0.85 $\pm$ 0.03*                             | 0.81 $\pm$ 0.03*                         |
| <b>LVM</b> (mg)       | 70 $\pm$ 5                | 152 $\pm$ 8*                                 | 114 $\pm$ 3*#                            |
| <b>r/h</b>            | 2.3 $\pm$ 0.2             | 2.3 $\pm$ 0.1                                | 2.2 $\pm$ 0.1                            |
| <b>HR</b> (beats/min) | 603 $\pm$ 8               | 563 $\pm$ 18                                 | 574 $\pm$ 20                             |

\* indicates p<0.05 by post-hoc testing after one way ANOVA vs. wild-type control.

# indicates p<0.05 by post-hoc testing after one way ANOVA for *Myh6CryABR120G* IF vs. ad-lib.

LVEDD = left ventricular end-diastolic dimension. LVESD = left ventricular end-systolic dimension. FS = fractional shortening. IVSd = diastolic thickness of the interventricular septum. PWTd = diastolic thickness of the posterior wall. LVM = left ventricular mass by echocardiography. r/h = radius to thickness ratio. HR = heart rate.



**Table S4. Evaluation of cardiac function by M-mode echocardiography in *Myh6CryaABR120G* mice treated with AAV9 control, AAV9 shTFEB, or AAV9shHspB8 and subjected to intermittent fasting (IF).** The data are presented at T0 (prior to initiation of IF at 4 weeks post AAV injection), T3 (3 weeks after initiation of IF) and T6 (6 weeks after IF). All data are shown as Mean  $\pm$  SEM.

|                          | <i>Myh6CryaABR120G</i><br>AAV9-shControl<br>(n=5) |                |                             | <i>Myh6CryaABR120G</i><br>AAV9-shTFEB<br>(n=5) |                |                              | <i>Myh6CryaABR120G</i><br>AAV9-shHspB8<br>(n=4) |                 |                 |
|--------------------------|---------------------------------------------------|----------------|-----------------------------|------------------------------------------------|----------------|------------------------------|-------------------------------------------------|-----------------|-----------------|
|                          | T0                                                | T3             | T6                          | T0                                             | T3             | T6                           | T0                                              | T3              | T6              |
| <b>LVEDD</b> (mm)        | 4.4 $\pm$ 0.2                                     | 4.4 $\pm$ 0.2  | 4.3 $\pm$ 0.2               | 4.2 $\pm$ 0.1                                  | 4.6 $\pm$ 0.1  | 4.6 $\pm$ 0.1                | 4.4 $\pm$ 0.3                                   | 4.7 $\pm$ 0.2   | 4.7 $\pm$ 0.1   |
| <b>LVESD</b> (mm)        | 3.3 $\pm$ 0.3                                     | 3.2 $\pm$ 0.3  | 2.9 $\pm$ 0.2               | 3.2 $\pm$ 0.1                                  | 3.4 $\pm$ 0.11 | 3.5 $\pm$ 0.13 <sup>\$</sup> | 3.4 $\pm$ 0.3                                   | 3.8 $\pm$ 0.3*  | 3.8 $\pm$ 0.2*  |
| <b>FS</b> (%)            | 25.9 $\pm$ 3.3                                    | 28.1 $\pm$ 3.8 | 33.7 $\pm$ 2.0 <sup>@</sup> | 25.2 $\pm$ 1.1                                 | 25.1 $\pm$ 1.1 | 24.4 $\pm$ 0.3*              | 22.7 $\pm$ 2.9                                  | 19.0 $\pm$ 3.2* | 19.6 $\pm$ 1.9* |
| <b>IVSd</b> (mm)         | 0.8 $\pm$ 0.04                                    | 0.8 $\pm$ 0.02 | 0.8 $\pm$ 0.02              | 0.8 $\pm$ 0.01                                 | 0.8 $\pm$ 0.02 | 0.8 $\pm$ 0.02               | 0.8 $\pm$ 0.02                                  | 0.8 $\pm$ 0.02  | 0.8 $\pm$ 0.04  |
| <b>PWTd</b> (mm)         | 0.7 $\pm$ 0.02                                    | 0.7 $\pm$ 0.01 | 0.7 $\pm$ 0.02              | 0.7 $\pm$ 0.01                                 | 0.7 $\pm$ 0.02 | 0.7 $\pm$ 0.01               | 0.7 $\pm$ 0.01                                  | 0.7 $\pm$ 0.01  | 0.7 $\pm$ 0.03  |
| <b>LVM</b> (mg)          | 125 $\pm$ 15                                      | 120 $\pm$ 10   | 114 $\pm$ 6                 | 111 $\pm$ 6                                    | 127 $\pm$ 6    | 125 $\pm$ 6                  | 127 $\pm$ 14                                    | 144 $\pm$ 13    | 133 $\pm$ 10    |
| <b>r/h</b>               | 3.1 $\pm$ 0.1                                     | 3.0 $\pm$ 0.1  | 3.0 $\pm$ 0.1               | 3.0 $\pm$ 0.1                                  | 3.1 $\pm$ 0.1  | 3.2 $\pm$ 0.1                | 2.9 $\pm$ 0.2                                   | 3.1 $\pm$ 0.1   | 3.3 $\pm$ 0.2   |
| <b>HR</b><br>(beats/min) | 556 $\pm$ 31                                      | 554 $\pm$ 13   | 557 $\pm$ 17                | 515 $\pm$ 14                                   | 558 $\pm$ 14   | 581 $\pm$ 10                 | 526 $\pm$ 19                                    | 538 $\pm$ 17    | 555 $\pm$ 31    |

@ indicates p<0.05 by post-hoc testing after 2-way ANOVA for comparison of AAV9-shControl at the T6 timepoint as compared to baseline (T0).

\* indicates p<0.05 by post-hoc testing after 2-way ANOVA for comparison of AAV9-shTFEB/shHspB8 groups vs. AAV9-shControl at the same time point.

\$ indicates p = 0.06 by post-hoc testing after 2-way ANOVA for comparison of AAV9-shTFEB vs. AAV9-shControl at the same time point.

LVEDD = left ventricular end-diastolic dimension. LVESD = left ventricular end-systolic dimension. FS = fractional shortening. IVSd = diastolic thickness of the interventricular septum.



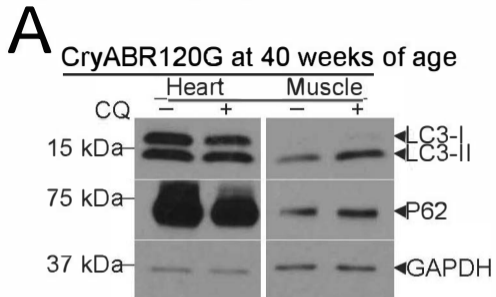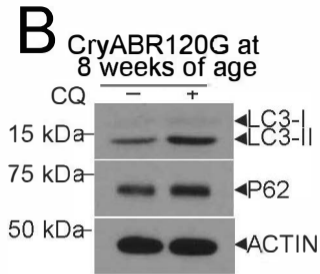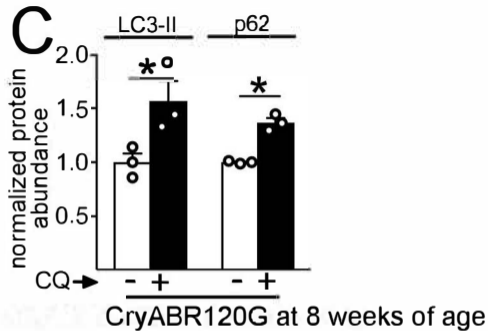

**Figure S1. Autophagic flux assessment reveals preserved autophagic flux in skeletal muscle from Myh6-R120G  $\alpha$ B-Crystallin TG mice and in the transgenic mouse hearts at a young age. A) Immuno-blot demonstrating LC3 and p62 expression in heart and skeletal muscle (gastrocnemius) tissue from 40 week old Myh6-R120G  $\alpha$ B-Crystallin TG mice treated with CQ or diluent for autophagic flux assessment (representative of n=2 experiments). B, C) Representative immuno-blot (B) depicting LC3-II and p62 expression with quantitation (C) in young (8 week) Myh6-R120G  $\alpha$ B-Crystallin TG mice treated with CQ or diluent for autophagic flux assessment. N=3/group. \* indicates P<0.05 by t-test.**

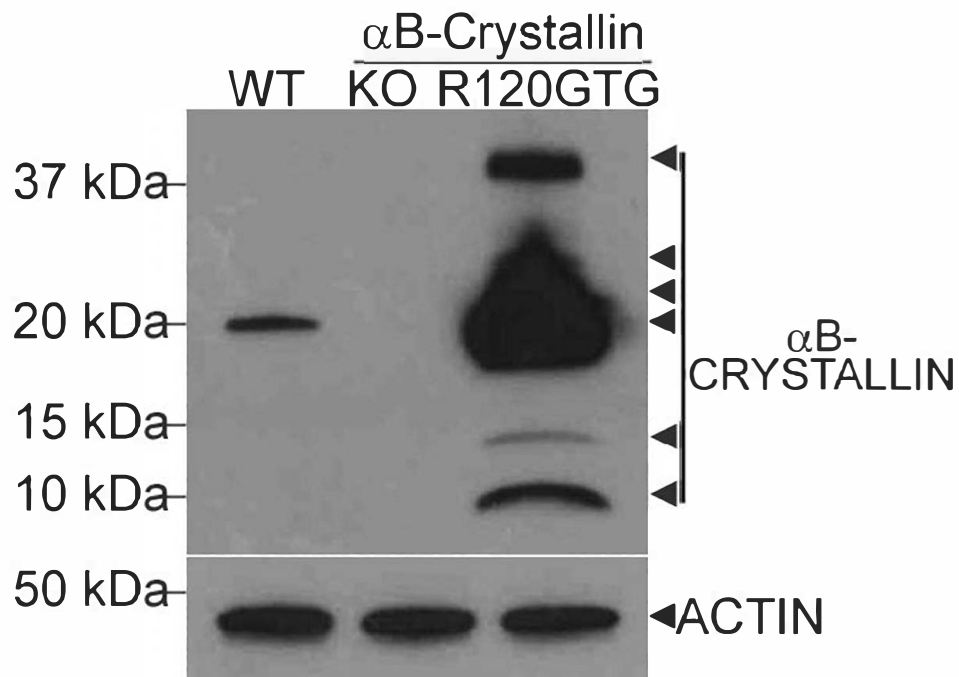

**Figure S2. Expression of  $\alpha$ B-Crystallin in Myh6-R120G  $\alpha$ B-Crystallin TG mice and CryAB null mice demonstrates specificity for immuno-detection of  $\alpha$ B-Crystallin.** Immunoblot demonstrating expression of  $\alpha$ B-Crystallin in hearts from Myh6-R120G  $\alpha$ B-Crystallin TG mice, CryAB null mice and wild-type controls. Arrows point to various electrophoretic bands detected with the polyclonal  $\alpha$ B-crystallin antibody employed herein.

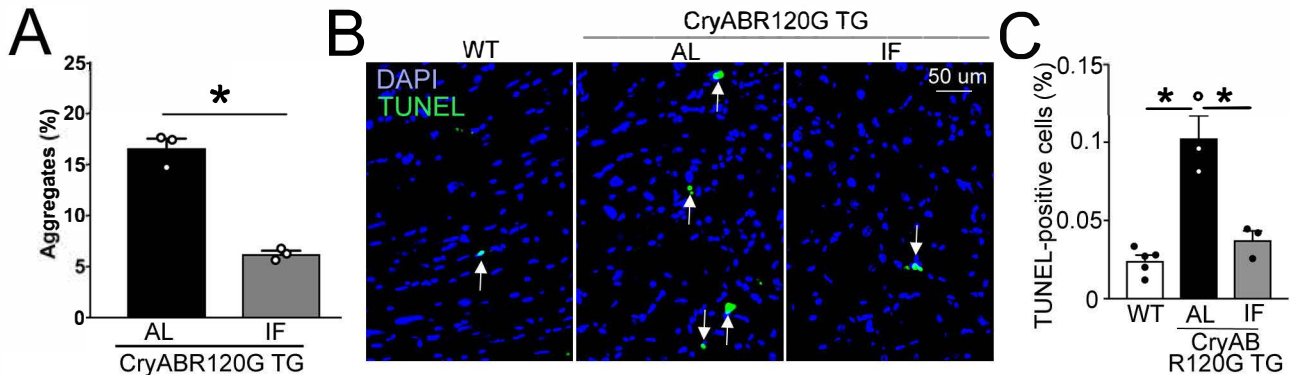

**Supplementary Figure S3: Intermittent fasting reduces aggregate pathology and myocardial cell death in *Myh6-R120G*  $\alpha$ B-Crystallin TG mice. **A)** Quantitation of aggregates in the myocardium (as % area), **B, C)** Representative TUNEL stained images (with DAPI-stained nuclei, **B)** with quantitation of TUNEL+ nuclei (arrows in **B**, quantified in **C)** in hearts from *Myh6-R120G*  $\alpha$ B-Crystallin TG mice subjected to intermittent fasting (IF) or ad-lib feeding for 6 weeks beginning at 40 weeks of age (see Fig. 2A for schematic) and WT controls (N=3-5/group). \* indicates  $P < 0.05$  by t-test for **A** and by post-hoc test after one-way ANOVA for **C**.**

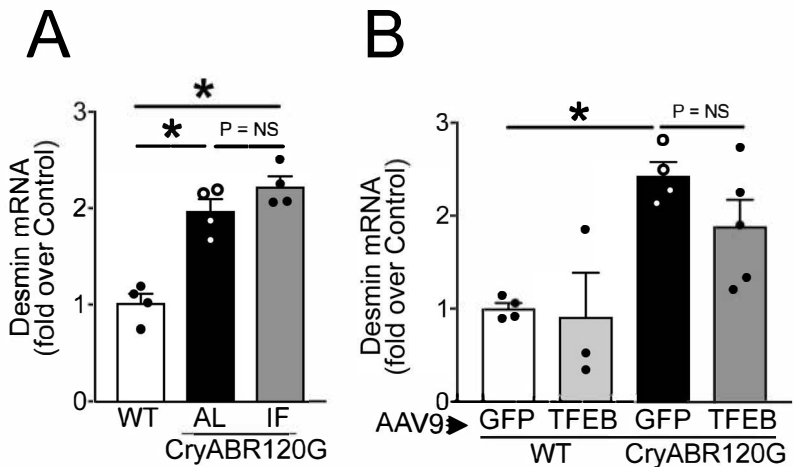

**Figure S4. Intermittent fasting and TFEB activation do not alter desmin transcription.** **A)** Transcript abundance for desmin in hearts from Myh6-R120G  $\alpha$ B-Crystallin TG mice subjected to intermittent fasting or ad-lib feeding, and littermate wild-type controls. N=4/group. \* indicates  $P < 0.05$  by post-hoc test after one-way ANOVA. **B)** Transcript abundance for desmin in hearts from Myh6-R120G  $\alpha$ B-Crystallin TG mice and littermate wild-type control mice transduced with AAV-TFEB or AAV-GFP. N=3-6/group. \* indicates  $P < 0.05$  by post-hoc test after one-way ANOVA.

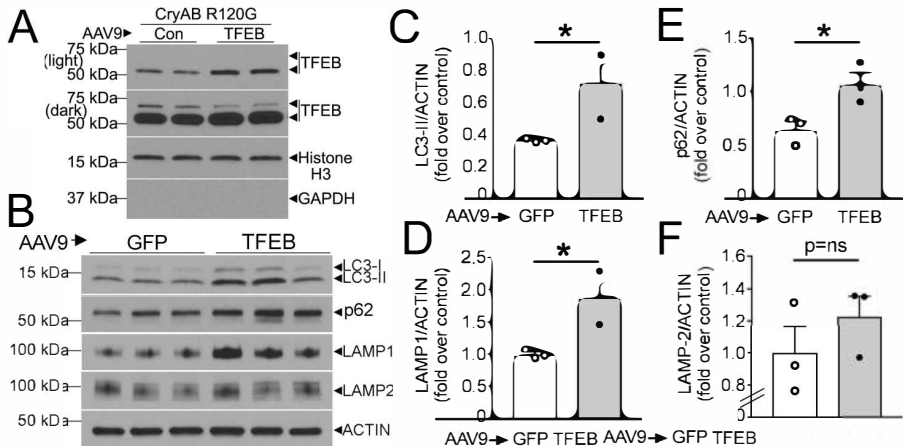

**Figure S5: AAV-mediated TFEB transduction upregulates abundance of candidate autophagy-lysosome target proteins.** A) Immunoblot depicting nuclear TFEB abundance in cardiac tissue from CryABR120G mice transduced with AAV-GFP or AAV-TFEB at 36 weeks of age, and sacrificed 10 weeks later. B-F) Representative immuno-blot with quantification of protein abundance for LC3-II (C), LAMP1 (D), p62 (E) and LAMP2 (F) in cardiac tissue from wild-type mice transduced with AAV-GFP or AAV-TFEB at 36 weeks of age, and sacrificed 10 weeks later. \* indicates P value by t-test. N=3/group.

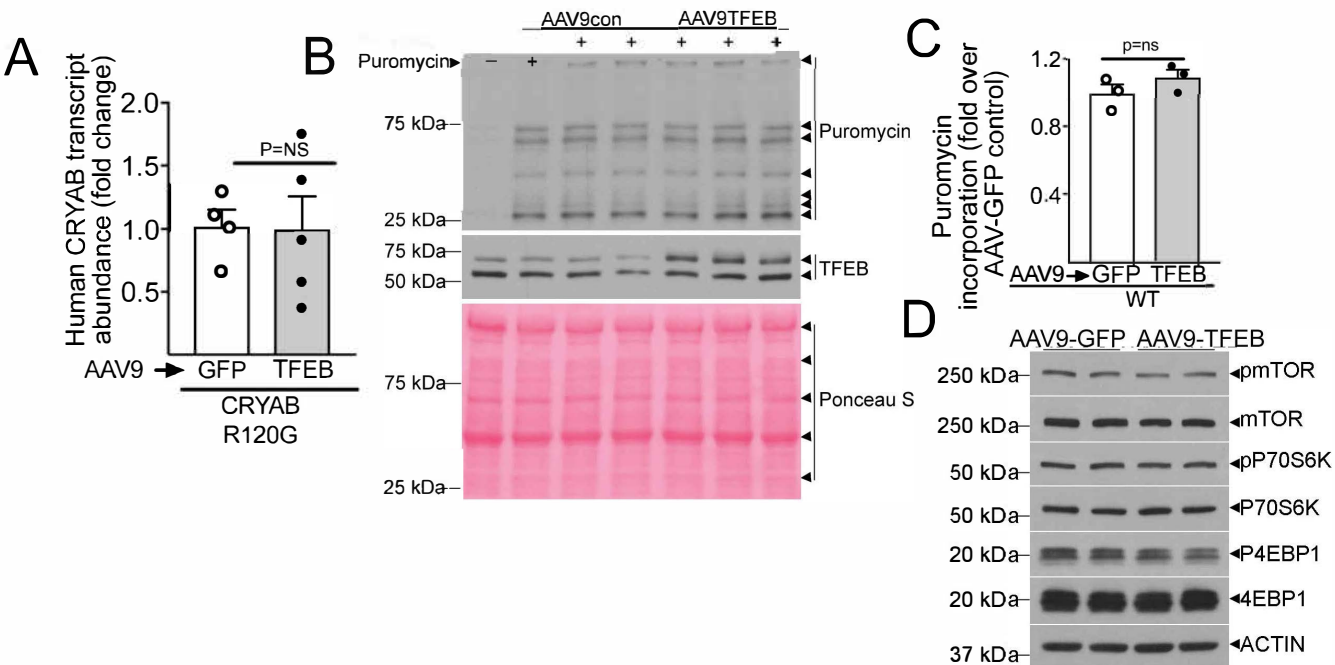

**Supplementary Figure S6: TFEB transduction does not alter transcript levels of the human CryAB R120G transgene and does not affect cardiac protein synthesis.** **A)** Quantitative PCR analysis for detecting human CRYAB transgene expression with specific primer set (see Supplementary Table 1) in Myh6-R120G  $\alpha$ B-Crystallin TG mice transduced with AAV-TFEB or AAV-GFP. N=4/group. **B, C)** Wild-type male C57bl6 mice (8 weeks old) were transduced with AAV-GFP or AAV-TFEB for 4 weeks and SunSET assay performed for assessing cardiac protein synthesis. Representative immuno-blot (**B**) with quantitation of puromycin incorporation (**C**) in cardiac extracts from a non-injected control mouse and AAV transduced mice. **D)** Representative immuno-blots for detecting mTOR activation state in mice treated as in **B**. P values were assessed by t-test in **A** and **C**.

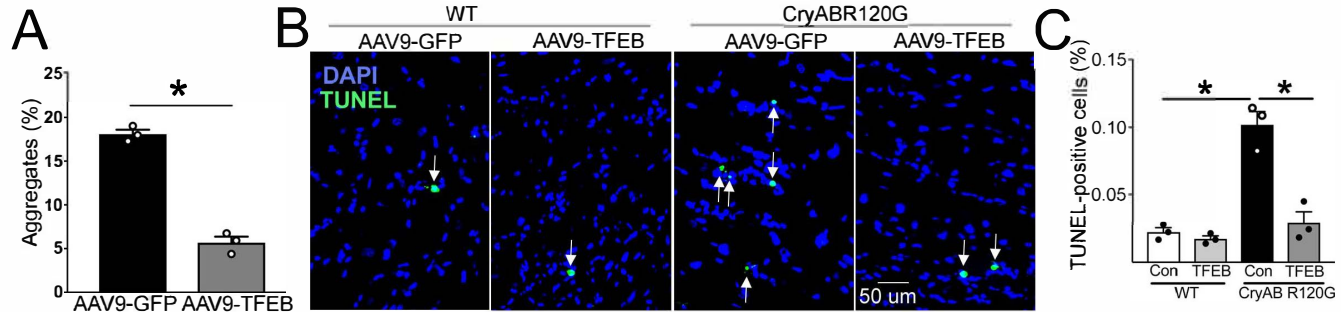

**Figure S7. TFEB transduction reduces aggregate pathology and myocardial cell death in *Myh6*-R120G  $\alpha$ B-Crystallin TG mice.** **A)** Quantitation of aggregates as % area of the myocardium in AAV-GFP and AAV-TFEB transduced mice at 46 weeks of age (see Figure 6A for images). N=3/group. \* indicates  $P < 0.05$  by t-test. **B, C)** Representative TUNEL stained images (with DAPI-stained nuclei, B) with quantitation of TUNEL<sup>+</sup> nuclei (pseudo-colored green, arrows in C) in hearts from *Myh6*-R120G  $\alpha$ B-Crystallin TG mice and WT controls transduced with AAV9-TFEB or AAV9-GFP for 10 weeks beginning at 36 weeks of age (see Fig. 5A for schematic) and WT controls (N=3-4/group). \* indicates  $P < 0.05$  by post-hoc test after one-way ANOVA

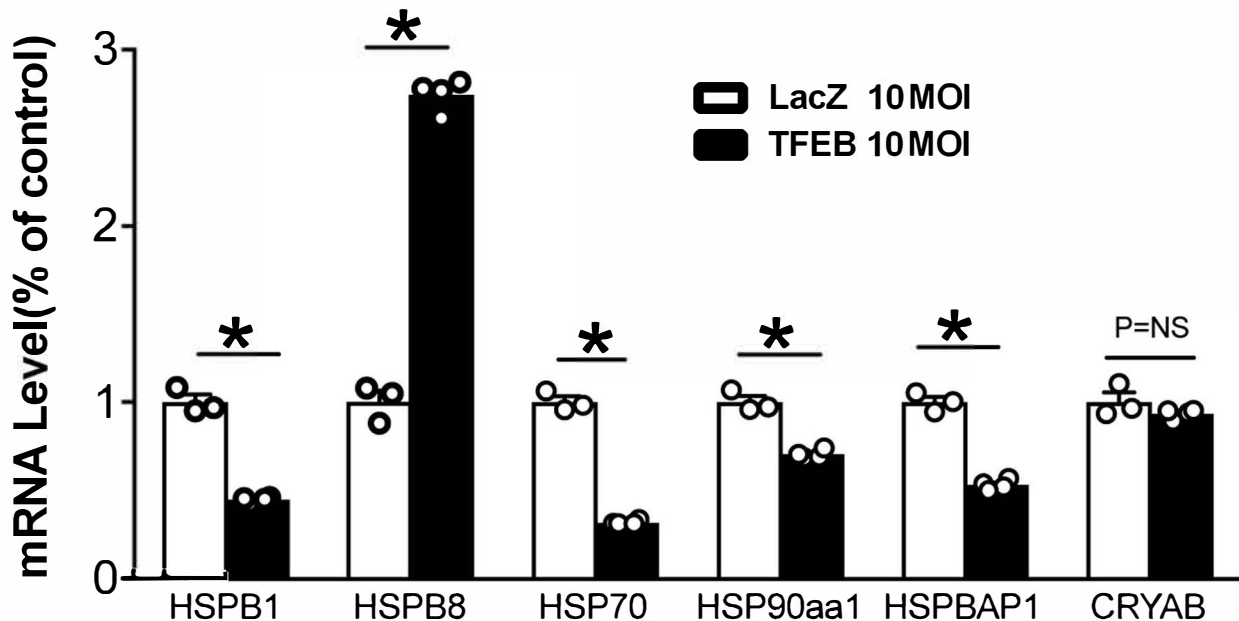

**Figure S8. TFEB induces HSPB8 expression.** Transcript abundance of various heat shock protein family members in NRCMs adenovirally transduced with HA-tagged TFEB or Ad-LacZ (MOI=10 each) for 24 hours. N=3-4/group. \* indicates  $P < 0.05$  by t-test.



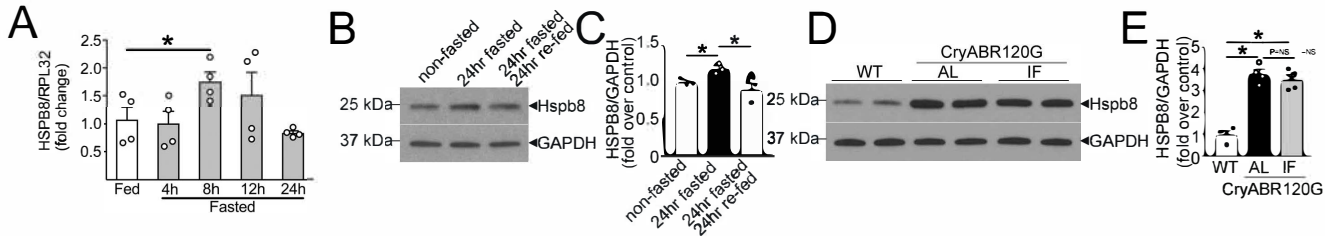

**Figure S9. Fasting increases HSPB8 transcript and protein levels in the myocardium.** **A)** HSPB8 transcript levels in cardiac tissue from C57bl6 wild-type mice fasted for various durations as shown. N=4/group. \* indicates  $P < 0.05$  by post-hoc analysis after one way ANOVA. **B, C)** Representative immunoblot (B) and quantitation of HSPB8 protein levels (C) in the myocardium from fed wild-type mice, mice fasted for 24 hours, and mice fasted for 24 hours followed by re-feeding for 24 hours. N=3/group. \* indicates  $P < 0.05$ . **D, E)** Representative immunoblot (D) and quantitation of HSPB8 protein levels (E) in the myocardium from Myh6-R120G  $\alpha$ B-Crystallin TG mice subjected to intermittent fasting (IF) or ad-lib feeding for 6 weeks beginning at 40 weeks of age (see Fig. 2A for schematic) and WT controls (N=4/group). \* indicates  $P < 0.05$  by post-hoc test after one-way ANOVA.

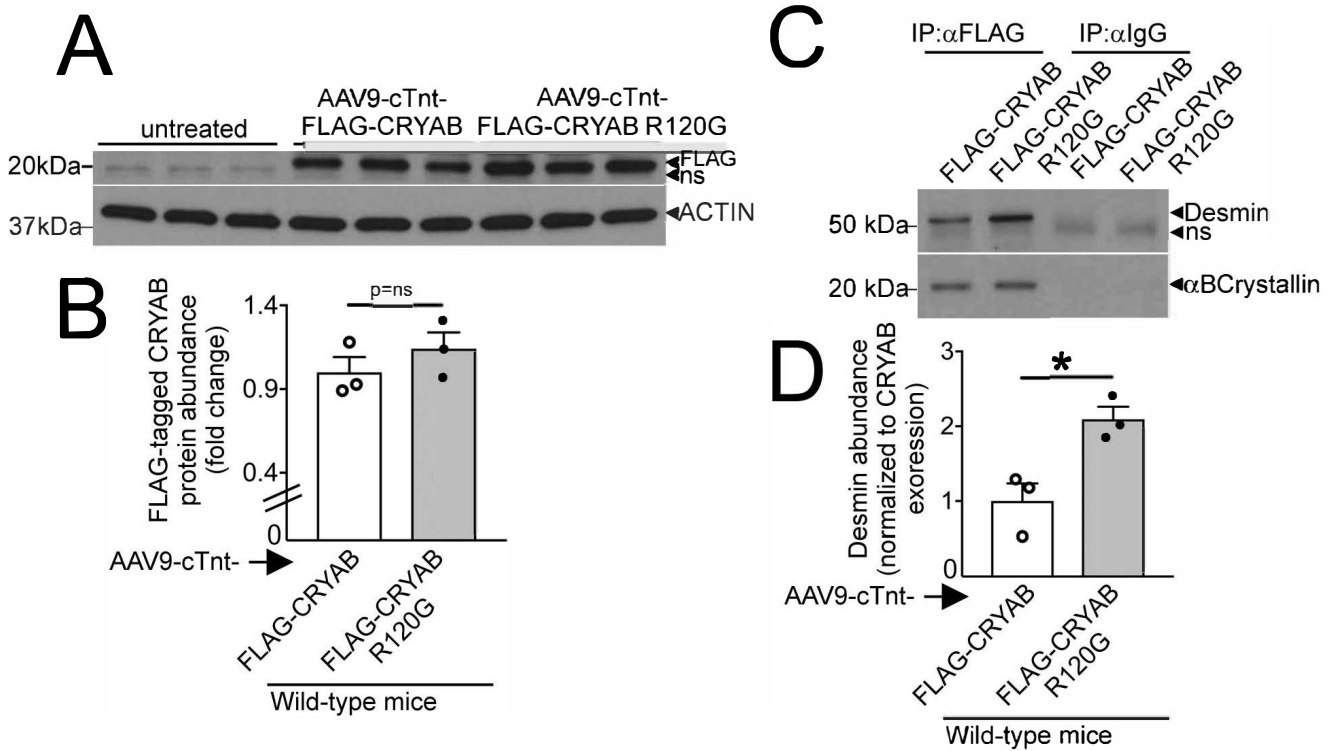

**Figure S10. R120G mutant CRYAB protein interacts more strongly with desmin than the wild-type CRYAB protein, in vivo.** **A)** Male C57bl6 mice at 8 weeks of age were transduced with AAV9 particles with cardiac troponin T promoter driven expression of FLAG-tagged human CRYAB protein or its R120G mutant for 4 weeks. Representative immuno-blot demonstrating expression of FLAG-tagged CRYAB proteins is shown in A. Mice not treated with AAV9 particles are shown as control; 'ns' indicates non-specific band. **B)** Quantitation of FLAG-tagged CRYAB protein and its R120G mutant in cardiac extracts from mice treated as in A. N=3/group. NS indicates not-significant for P value by t-test. **C)** Immuno-precipitation was performed with anti-FLAG antibody (or IgG control) in cardiac extracts from mice treated as in A and immuno-blot performed for desmin and CRYAB. Representative immuno-blot is shown. **D)** Quantitation of desmin expression in after immuno-precipitation with anti-FLAG antibody as shown in C. N=3/group. \* indicates  $P < 0.05$  by t-test.



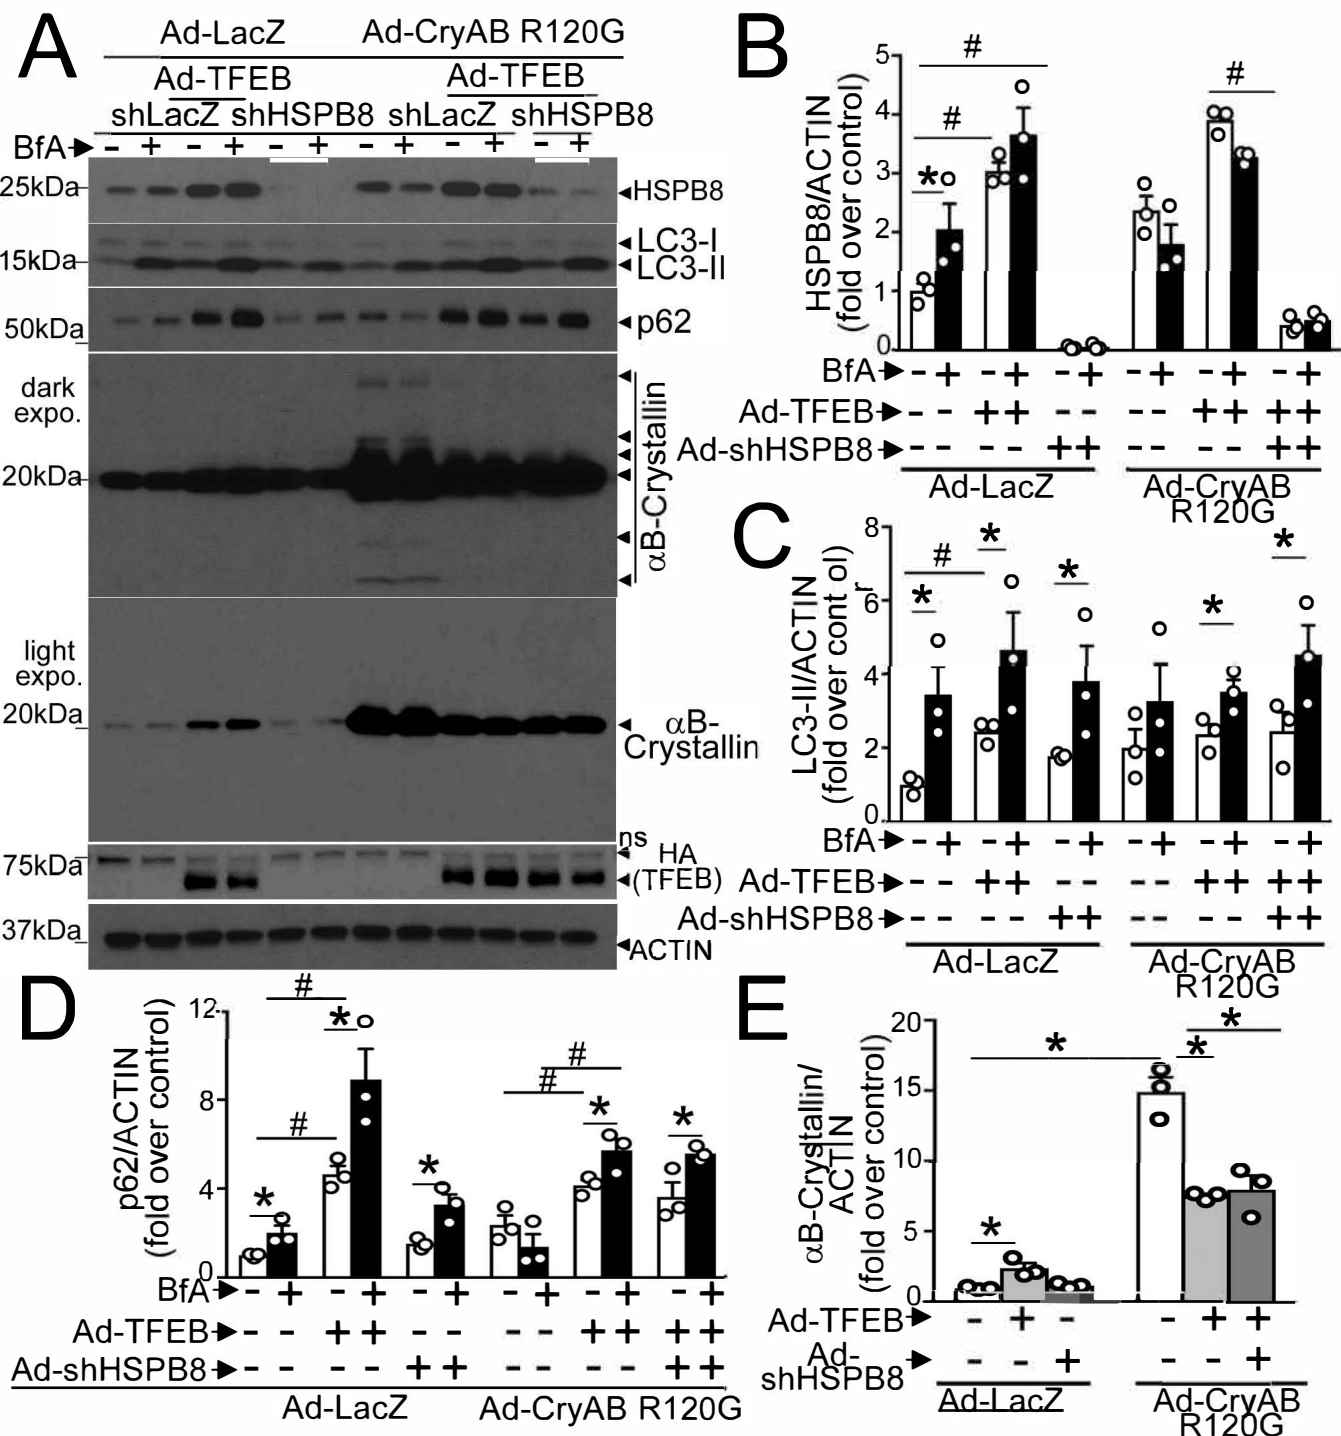

**Figure S12. TFEB promotes clearance of αB-crystallin via induction of autophagic flux, independent of HSPB8 in NRCMs.** A) Representative immunoblot demonstrating assessment of autophagic flux and HSPB8 expression in NRCMs adenovirally transduced with R120G mutant of αB-crystallin (MOI=10; for 48 hours) without or with HA-tagged TFEB (MOI=10; for 24 hours) in the presence of adenoviral particles expressing shRNA targeting rat HSPB8 (shHSPB8; MOI=100 for 72 hours) and treated with bafilomycin A1 (BfA; 200nM or diluent for 2 hours) to inhibit lysosomal acidification. Adenoviral particles coding for LacZ or shLacZ were added as controls simultaneously with Ad-TFEB or Ad-αB-crystallin overexpression and sh-HSPB8, respectively, to equalize the number of viral particles. B-D) Quantitation of HSPB8 (B), LC3-II (C) and p62 (D) expression in NRCMs treated as in A. N=3/group. \* indicates P<0.05 by t-test within BfA and diluent treated groups; and # indicates P<0.05 by post-hoc test after one-way ANOVA for comparisons within the diluent treated group only. E) Quantitation of αB-crystallin expression in the non-BfA treated samples from A. \* indicates P<0.05 by one-way ANOVA.

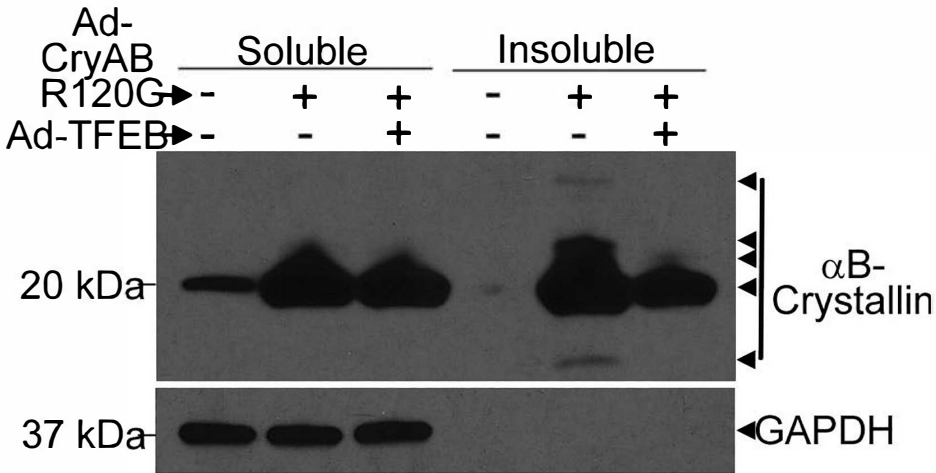

**Figure S13. TFEB promotes removal of αB-Crystallin aggregates in NRCMs.** Immunoblot demonstrating αB-Crystallin expression in soluble and insoluble fractions from NRCMs adenovirally transduced with R 120G mutant of αB-Crystallin (MOI=1.0; for 48 hours) without or with HA-tagged TFEB (MOI=1.0; for 24 hours). Adenoviral particles coding for LacZ were added as controls simultaneously to equalize the number of viral particles.

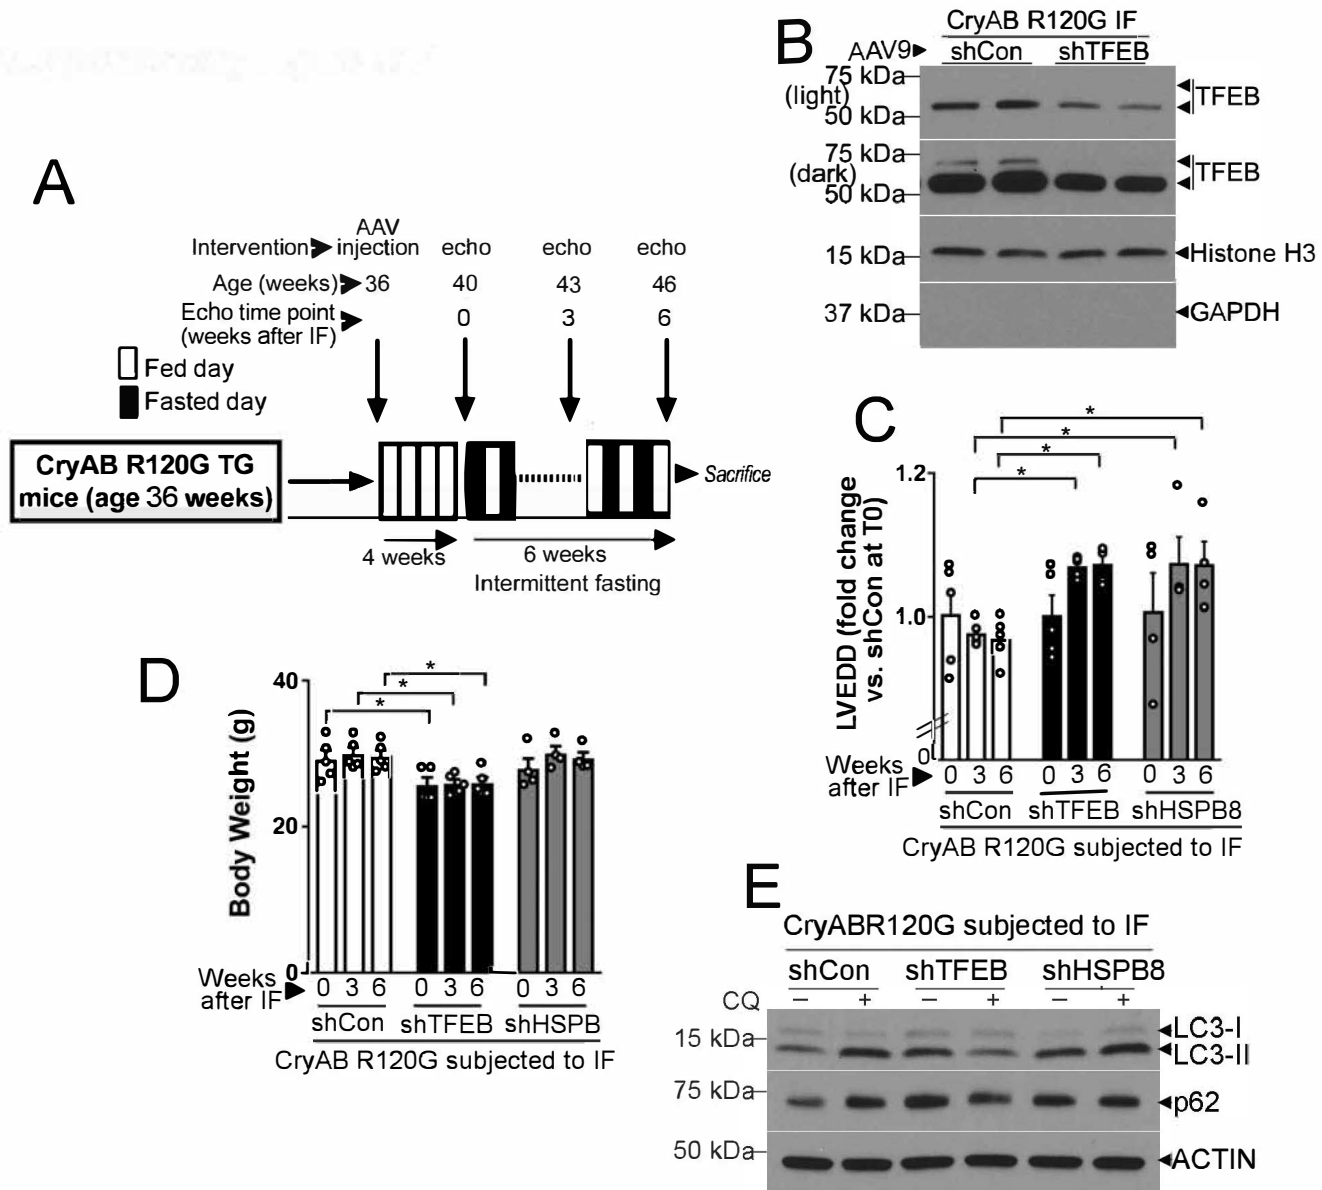

**Figure S14. Knockdown of TFEB and HSPB8 prevents intermittent fasting-mediated attenuation of proteotoxic cardiomyopathy.** **A)** Schematic depicting experimental intervention with AAV9- mediated shRNA transduction (directed to either TFEB or HSPB8 vs. control sh RNA) in 36 week old Myh6- CryABR120G TG mice. Four weeks after AAV injection, baseline echocardiograms were obtained followed by 6 weeks of intermittent fasting (termed T=0 time point). Serial echocardiograms were then obtained at 3 weeks and 6 weeks (termed T=3 and T=6 time points, respectively), followed by sacrifice and post mortem biochemical, microscopic and immuno-histochemical analysis. **B)** Immunoblot depicting levels of nuclear TFEB after transduction with shTFEB vs. shCon. **C)** Left ventricular end-diastolic diameter assessed as fold-change compared to baseline (T=0 weeks) data-point in the control group, in mice treated as in A. N=4-5/group. \* indicates P<0.05 by post-hoc test after two-way ANOVA. **D)** Body weight over the duration of the study in mice treated as in A. N=4-5/group. \* indicates P<0.05 by post-hoc test after two-way ANOVA. **E)** Representative immuno-blot demonstrating expression of LC3 and p62 in mice modeled as in A and injected with chloroquine (40 mg/kg) 4 hours prior to sacrifice to assess autophagic flux. Representative of n=2 experiments.

\* indicates P<0.05 by post-hoc test after two-way ANOVA. **D)** Representative immuno-blot demonstrating expression of LC3 and p62 in mice modeled as in A and injected with chloroquine (40 mg/kg) 4 hours prior to sacrifice to assess autophagic flux. Representative of n=2 experiments.

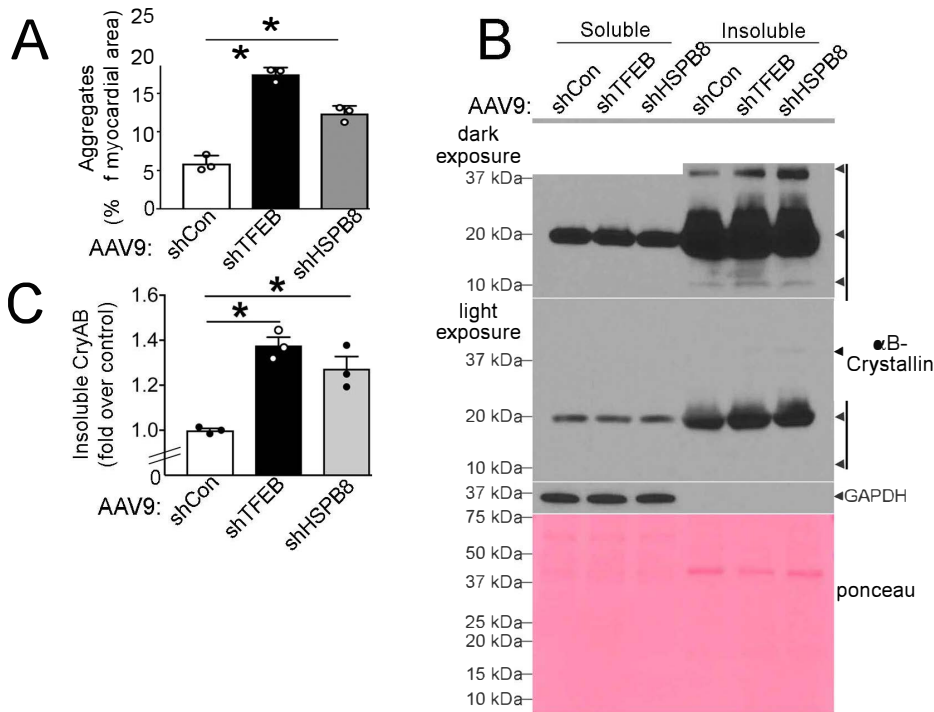

**Figure S15.** Knockdown of TFEB and HSPB8 prevents intermittent fasting-mediated removal of aggregates with persistent desmin localization to aggregates. A) Quantitation of aggregates as % area of the myocardium in Myh6-CryABR120G TG mice transduced with AAV9-shControl, AAV9-shTFEB or AAV9-shHSPB8 for 4 weeks at age of 36 weeks and subjected to intermittent fasting, assessed at 46 weeks of age. See Figure 8G for representative images. N=3/group. P value is by post-hoc test after one-way ANOVA. B, C) Representative immuno-blot (B) with quantitation of  $\alpha$ B-crystallin in insoluble (C) myocardial fractions from Myh6-CryABR120G TG mice at 46 weeks of age injected with AAV9 particles coding for shRNAs targeting TFEB or HSPB8, or control for 4 weeks and then subjected to intermittent fasting for 6 weeks. N=3/group. P value is by post-hoc test after one-way ANOVA.

**Statistical Values calculated using R code for figure panels labeled as below**

**1) Figure 1B:**

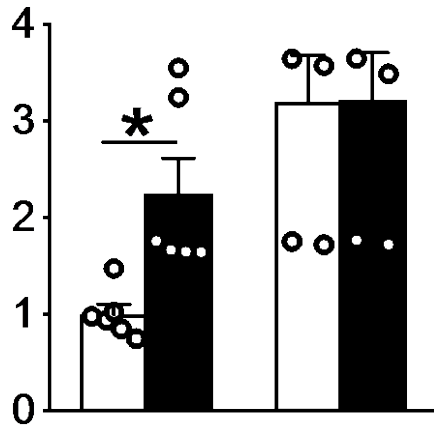

Exact Permutation Test (complete enumeration)

data: WT dil and WT CQ

p-value = 0.002165

alternative hypothesis: true mean s10 - mean s20 is 0

sample estimates:

mean WT dil - mean WT cq

-0.5683489

data: CryAB dil and CryAB CQ

p-value = 0.9524

alternative hypothesis: true mean s11 - mean s21 is 0

sample estimates:

mean CryAB dil - mean CryAB CQ

0.1116057



2) Figure. 1C:

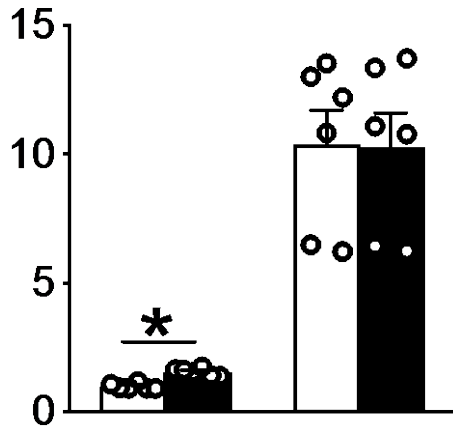

Exact Permutation Test (complete enumeration)

data: WT dil and WT CQ

p-value = 0.002165

alternative hypothesis: true mean s10 - mean s20 is 0

sample estimates:

mean WT dil - mean WT CQ

-0.5683489

data: CryAB dil and CryAB CQ

p-value = 0.9524

alternative hypothesis: true mean s11 - mean s21 is 0

sample estimates:

mean CryAB dil - mean CryAB CQ

0.1116057

3) Figure. 1D

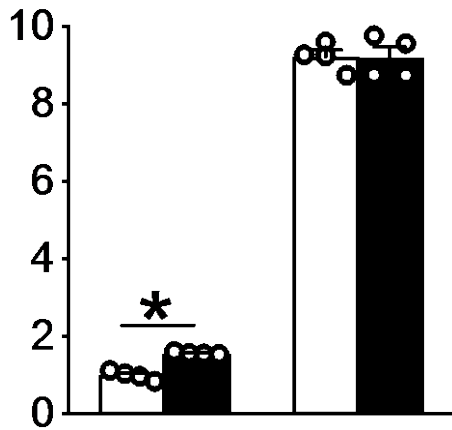

Exact Permutation Test (complete enumeration)

data: WT dil and WT CQ

p-value = 0.002165

alternative hypothesis: true mean s10 - mean s20 is 0

sample estimates:

mean WT dil - mean WT CQ

-0.5683489

data: CryAB dil and CryAB CQ

p-value = 0.9524

alternative hypothesis: true mean s11 - mean s21 is 0

sample estimates:

mean CryAB dil - mean CryAB CQ

0.1116057

4) Figure. 2D

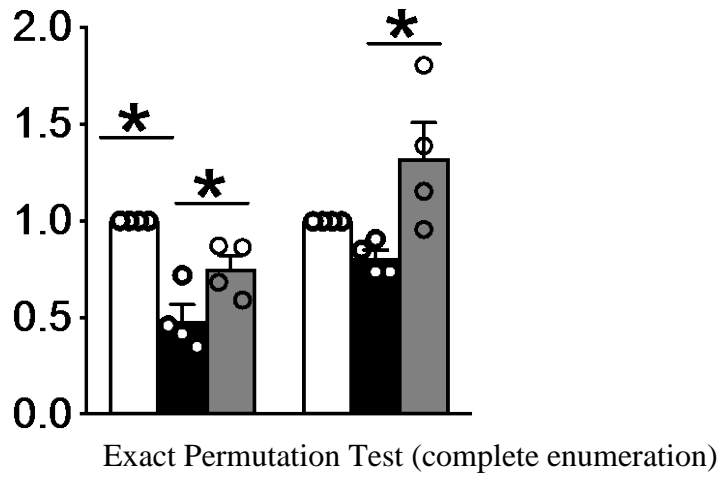

data: WT and CryAb AL

p-value = 0.02857

alternative hypothesis: true mean s10 - mean s11 is 0

sample estimates:

mean s10 - mean s11

0.5142135

data: Cyto: CryAB AL and CryAB IF

p-value = 0.08571

alternative hypothesis: true mean s11 - mean s12 is 0

sample estimates:

mean s11 - mean s12

-0.2665246

data: Nuc: CryAB AL and CryAB IF

p-value = 0.02857

alternative hypothesis: true mean s21 - mean s22 is 0

sample estimates:

mean s21 - mean s22

-0.5184553

5) Figure. 2F

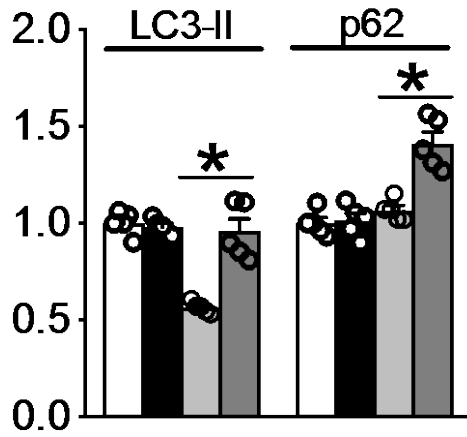

Exact Permutation Test (complete enumeration)

data: LC3-II CryAB R120G IF dil vs. CRYAB R120G IF CQ

p-value = 0.0079

alternative hypothesis: true mean s12 - mean s13 is

sample estimate

mean s12 - mean s1

-0.391546

data: p62 CryAB R120G IF dil vs. CRYAB R120G IF CQ

p-value = 0.0079

alternative hypothesis: true mean s22 - mean s23 is

sample estimate

mean s22 - mean s2

-0.3453506

**6) Figure. 2H**

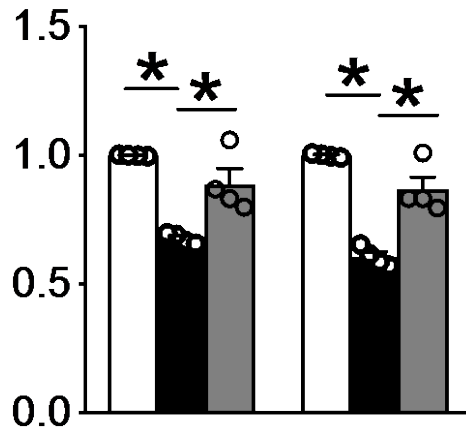

Exact Permutation Test (complete enumeration)

data: LAMP1: WT and CRYAB AL

p-value = 0.02857

alternative hypothesis: true mean s10 - mean s11 is 0

sample estimates:

mean s10 - mean s11

0.3220731

data: LAMP1: CRYAB AL and CRYAB IF

p-value = 0.02857

alternative hypothesis: true mean s11 - mean s12 is 0

sample estimates:

mean s11 - mean s12

-0.2118281

data: LAMP2: WT and CRYAB AL

p-value = 0.02857

alternative hypothesis: true mean s20 - mean s21 is 0

sample estimates:

mean s20 - mean s21

0.3928372

data: LAMP2: CRYAB AL and CRYAB IF

p-value = 0.02857

alternative hypothesis: true mean s21 - mean s22 is 0

sample estimates:

mean s21 - mean s22

-0.2607011

7) Figure. 2J

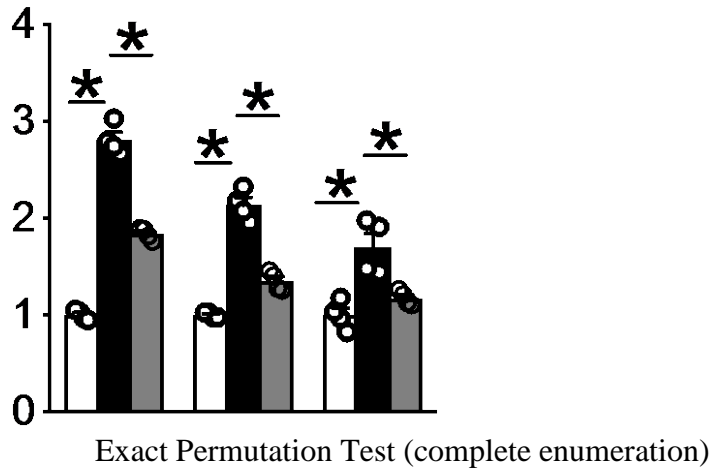

data: pMTOR/mTOR WT vs. CRYAB AL  
 p-value = 0.02857  
 alternative hypothesis: true mean s10 - mean s11 is 0  
 sample estimates:  
 mean s10 - mean s11  
 -1.810188

data: : pMTOR/mTOR CRYAB AL vs. CRYAB IF  
 p-value = 0.02857  
 alternative hypothesis: true mean s11 - mean s12 is 0  
 sample estimates:  
 mean s11 - mean s12  
 0.9711987

data p-S6K/S6K WT vs. CRYAB AL  
 p-value = 0.02857  
 alternative hypothesis: true mean s20 - mean s21 is 0  
 sample estimates:  
 mean s20 - mean s21  
 -1.134393

data: S6K/S6K CRYAB AL vs. CRYAB IF  
 p-value = 0.02857  
 alternative hypothesis: true mean s21 - mean s22 is 0  
 sample estimates:  
 mean s21 - mean s22  
 0.7850461

data: p-4EBP1/4EBP1 WT vs. CRYAB AL  
 p-value = 0.02857  
 alternative hypothesis: true mean s30 - mean s31 is 0

sample estimates:  
mean s30 - mean s31  
-1.134386

data: p-4EBP1/4EBP1 CRYAB AL vs. CRYAB IF  
p-value = 0.02857  
alternative hypothesis: true mean s31 - mean s32 is 0  
sample estimates:  
mean s31 - mean s32  
0.7850461

8) **Figure. 3B**

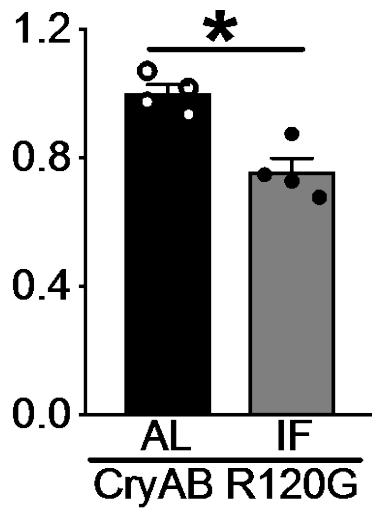

Exact Permutation Test (complete enumeration)

data: CRYAB AL vs. IF

p-value = 0.02857

alternative hypothesis: true mean s1 - mean s2 is 0

sample estimates:

mean s1 - mean s2

-0.2432008



9) Figure. 3C

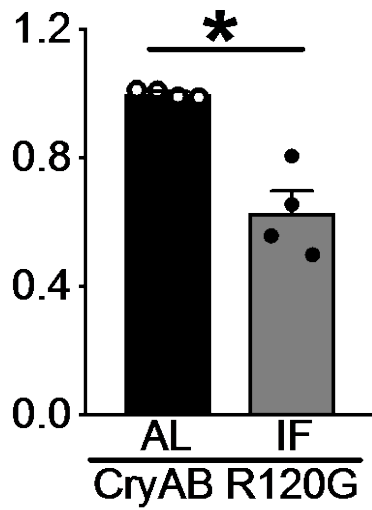

Exact Permutation Test (complete enumeration)

data: CRYAB AL vs. IF

p-value = 0.02857

alternative hypothesis: true mean s1 - mean s2 is 0

sample estimates:

mean s1 - mean s2

-0.3708712

10) Figure. 4B

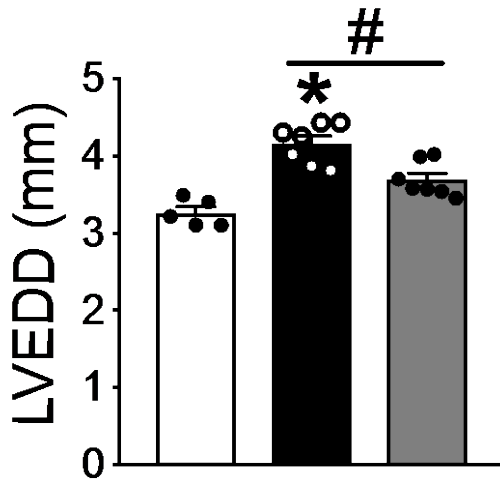

data: WTAL vs. CRYAB AL

p-value = 0.001263

alternative hypothesis: true mean s2 - mean s3 is > 0

sample estimates:

mean s2 - mean s3

-0.8959714

data: CRYAB IF and CRYAB AL

p-value = 0.006993

alternative hypothesis: true mean s1 - mean s3 is > 0

sample estimates:

mean s1 - mean s3

-0.4657143

data: CRYAB IF and WT AL

p-value = 0.005051

alternative hypothesis: true mean s1 - mean s2 is > 0

sample estimates:

mean s1 - mean s2

0.4302571

11) Figure. 4C

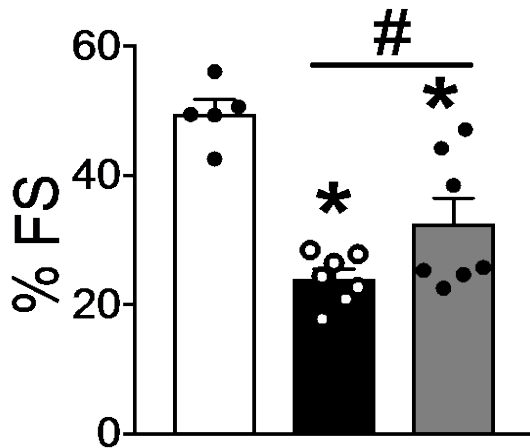

Exact Permutation Test (complete enumeration)

data: CRYAB AL vs. IF

Exact Permutation Test (complete enumeration)

data: WTAL vs. CRYAB AL

p-value = 0.001263

alternative hypothesis: true mean s2 - mean s3 is 0

sample estimates:

mean s2 - mean s3

25.54954

data: CRYAB IF and CRYAB AL

p-value = 0.08159

alternative hypothesis: true mean s1 - mean s3 is 0

sample estimates:

mean s1 - mean s3

8.524286

data: CRYAB IF and WT AL

p-value = 0.01136

alternative hypothesis: true mean s1 - mean s2 is 0

sample estimates:

mean s1 - mean s2

-17.02526

12) Figure. 4D

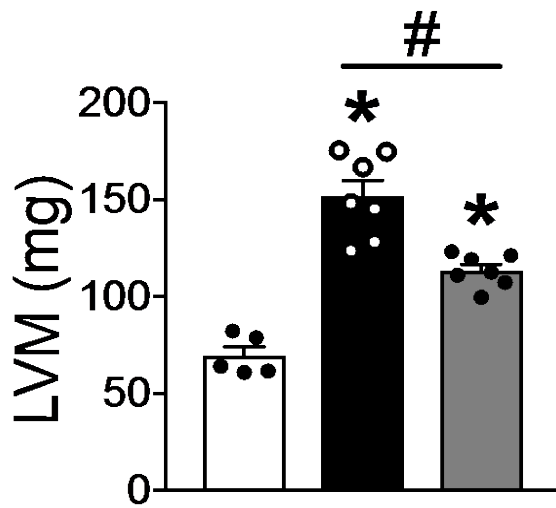

Exact Permutation Test (complete enumeration)

data: CRYAB AL vs. IF

p-value = 0.001263

alternative hypothesis: true mean s2 - mean s3 is 0

sample estimates:

mean s2 - mean s3

-82.17463

13) Figure. 4E

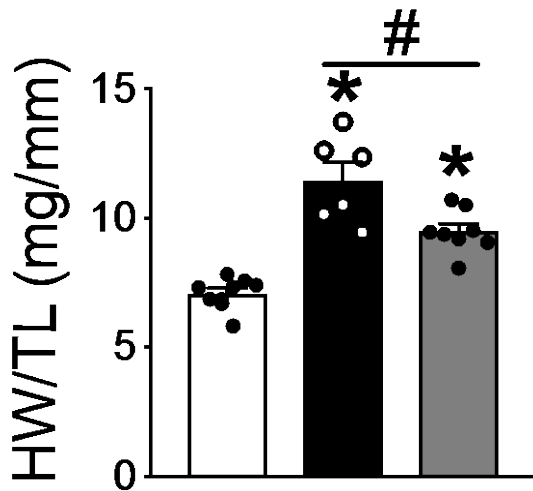

Exact Permutation Test (complete enumeration)

data: CRYAB AL vs. IF

p-value = 0.0001998

alternative hypothesis: true mean s2 - mean s3 is 0

sample estimates:

mean s2 - mean s3

-4.391861

data: CRYAB IF and CRYAB AL

p-value = 0.01132

alternative hypothesis: true mean s1 - mean s3 is 0

sample estimates:

mean s1 - mean s3

-1.983246

data: CRYAB IF and WT AL

p-value = 4.114e-05

alternative hypothesis: true mean s1 - mean s2 is 0

sample estimates:

mean s1 - mean s2

2.408615

14) Figure. 5C

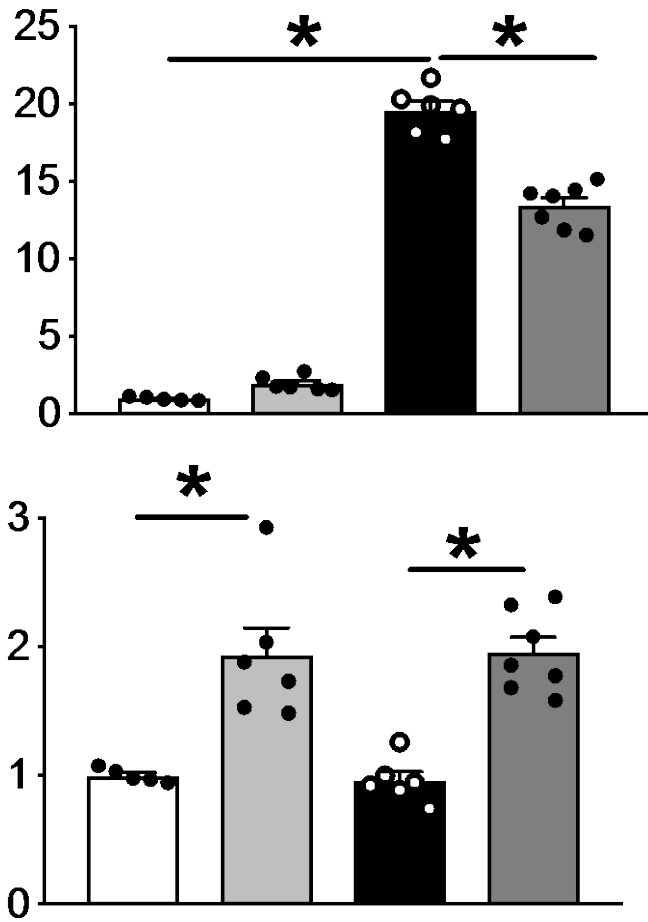

Exact Permutation Test (complete enumeration)

data: TFEB WT AAV GFP and WT AAV TFEB

p-value = 0.004329

alternative hypothesis: true mean s2 - mean s3 is > 0

sample estimates:

mean s2 - mean s3

0.9304463

data: TFEB CRYAB AAV GFP and CRYAB AAV TFEB

p-value = 0.0005828

alternative hypothesis: true mean s1 - mean s4 is > 0

sample estimates:

mean s1 - mean s4

0.995846

data: Crystallin WT AAV GFP and WT AAV TFEB  
p-value = 0.002165  
alternative hypothesis: true mean s2 - mean s3 is 0  
sample estimates:  
mean s2 - mean s3  
0.9835765

data: Crystallin WT AAV GFP and CRYAB AAV TFEB  
p-value = 0.002165  
alternative hypothesis: true mean s2 - mean s4 is 0  
sample estimates:  
mean s2 - mean s4  
-17.61125

data: Crystallin CRYAB AAV GFP and CRYAB AAV TFEB  
p-value = 0.0005828  
alternative hypothesis: true mean s1 - mean s4 is sample estimates:  
mean s1 - mean s4  
-6.151504

15) Figure. 5E

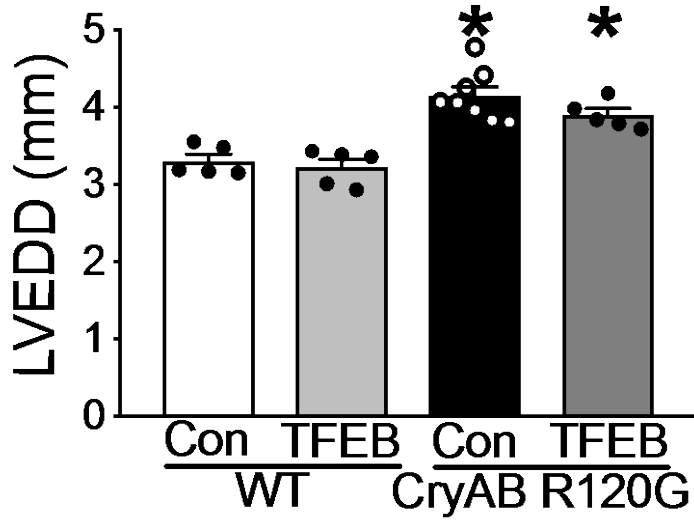

Exact Permutation Test (complete enumeration)

data: WT + AAV GFP VS. CRYAB R120 + AAV GFP

p-value = 0.000777

alternative hypothesis: true mean s3 - mean s4 is 0

sample estimates:

mean s3 - mean s4

-0.8395

data: CRYABR120G + AAV GFP VS. CRYAB R120 + AAV TFEB

p-value = 0.1593

alternative hypothesis: true mean s1 - mean s4 is 0

sample estimates:

mean s1 - mean s4

-0.2455



16) Figure. 5F

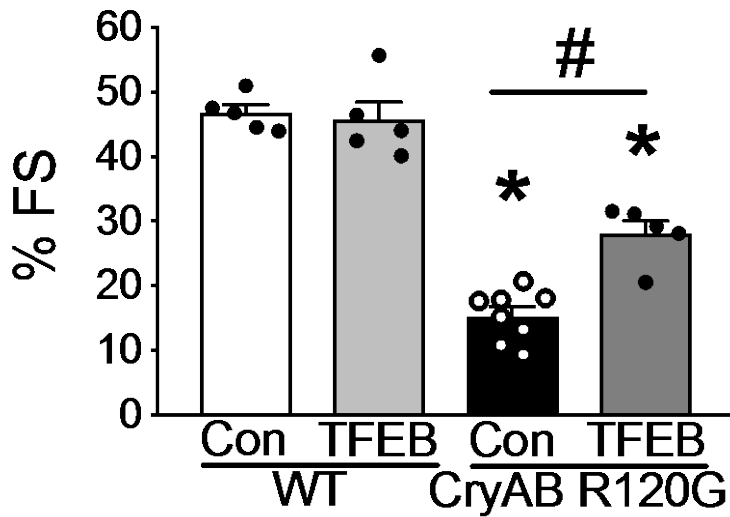

Exact Permutation Test (complete enumeration)

data: CRYAB R120G AAV GFP VS. CRYABR120G AAV TFEB

p-value = 0.001554

alternative hypothesis: true mean s1 - mean s4 is 0

sample estimates:

mean s1 - mean s4

12.76925

data: CRYABR120G AAV TFEB and WT AAV9 GFP

p-value = 0.007937

alternative hypothesis: true mean s1 - mean s3 is 0

sample estimates:

mean s1 - mean s3

-18.662

data: CRYAB R120G AAV GFP and WT AAV9 GFP

p-value = 0.000777

alternative hypothesis: true mean s3 - mean s4 is 0

sample estimates:

mean s3 - mean s4

31.43125

17) Figure. 5G

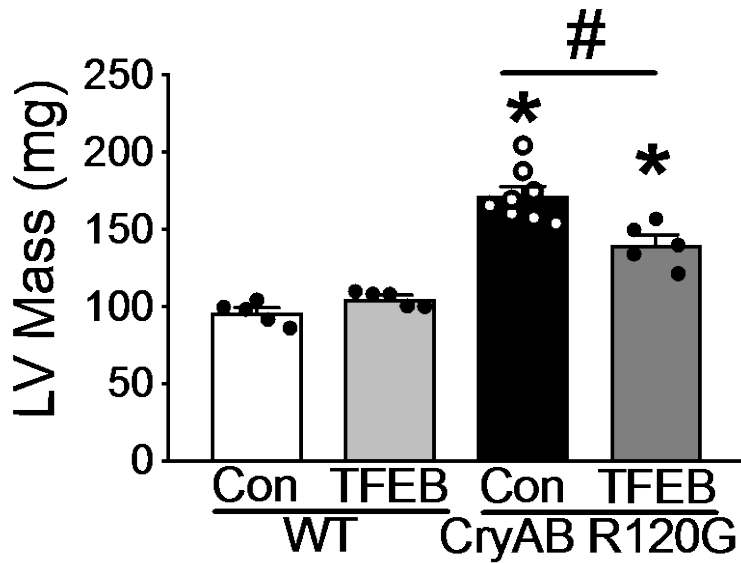

Exact Permutation Test (complete enumeration)

data: CRYAB R120G AAV GFP vs. CRYABR120G AAV TFEB

p-value = 0.003108

alternative hypothesis: true mean s1 - mean s4 is 0

sample estimates:

mean s1 - mean s4

-31.3035

data: CRYABR120G AAV TFEB and WT AAV9 GFP

p-value = 0.007937

alternative hypothesis: true mean s1 - mean s3 is 0

sample estimates:

mean s1 - mean s3

44.326

data: CRYAB R120G AAV GFP and WT AAV9 GFP

p-value = 0.000777

alternative hypothesis: true mean s3 - mean s4 is 0

sample estimates:

mean s3 - mean s4

-75.6295

18) Figure. 5H

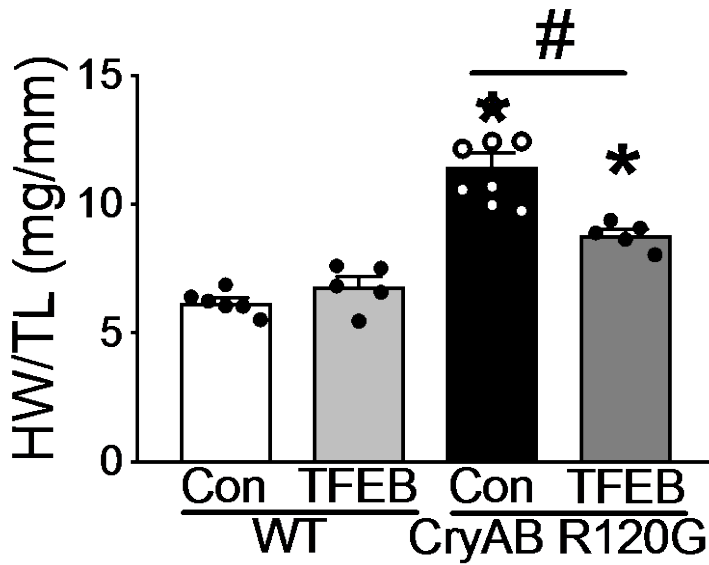

Exact Permutation Test (complete enumeration)

data: CRYAB R120G AAV GFP vs. CRYABR120G AAV TFEB

p-value = 0.003108

alternative hypothesis: true mean s1 - mean s4 is 0

sample estimates:

mean s1 - mean s4

-31.3035

data: CRYABR120G AAV TFEB and WT AAV9 GFP

p-value = 0.007937

alternative hypothesis: true mean s1 - mean s3 is 0

sample estimates:

mean s1 - mean s3

44.326

data: CRYAB R120G AAV GFP and WT AAV9 GFP

p-value = 0.000777

alternative hypothesis: true mean s3 - mean s4 is 0

sample estimates:

mean s3 - mean s4

-75.6295

19) Figure 6C

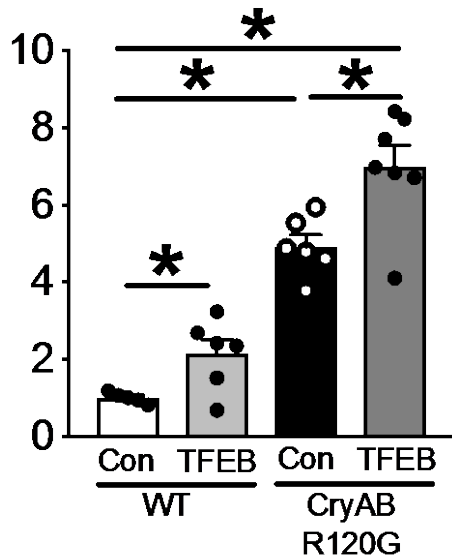

Exact Permutation Test (complete enumeration)

data: HSPB8/ACTIN WT AAV GFP vs. WT AAV TFEB

p-value = 0.0303

alternative hypothesis: true mean s2 - mean s3 is 0

sample estimates:

mean s2 - mean s3

1.144588

data: HSPB8/ACTIN WT AAV GFP vs. CRYAB R120G AAV GFP

p-value = 0.002165

alternative hypothesis: true mean s3 - mean s4 is 0

sample estimates:

mean s3 - mean s4

-3.923404

data: HSPB8/ACTIN CRYAB R120G AAV GFP vs. CRYAB R120G AAV TFEB

p-value = 0.01166

alternative hypothesis: true mean s1 - mean s4 is 0

sample estimates:

mean s1 - mean s4

2.077214

data: HSPB8/ACTIN WT AAV GFP vs. CRYAB R120G AAV TFEB

p-value = 0.001263

alternative hypothesis: true mean s1 - mean s3 is 0

sample estimates:  
mean s1 - mean s3  
6.000618

20) **Figure 6D**

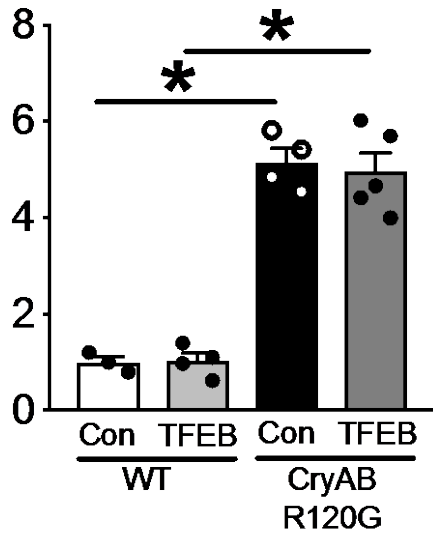

Exact Permutation Test (complete enumeration)

data: HSPB1/ACTIN WT AAV GFP vs. CRYABR120G AAV GFP

p-value = 0.01786

alternative hypothesis: true mean s1 - mean s3 is 0

sample estimates:

mean s1 - mean s3

3.960078

data: HSPB1/ACTIN WT AAV TFEB vs. CRYABR120G AAV TFEB

p-value = 0.007937

alternative hypothesis: true mean s1 - mean s2 is 0

sample estimates:

mean s1 - mean s2

3.93306

21) **Figure 6E**

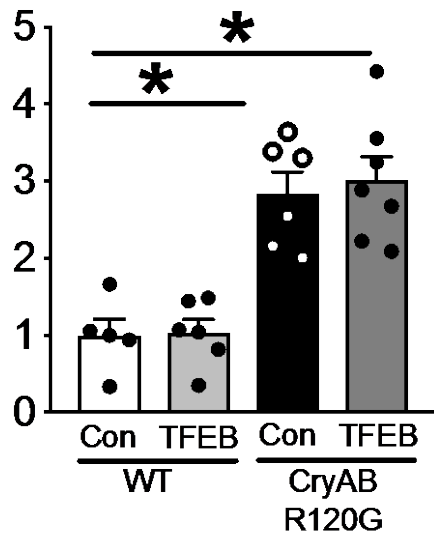

Exact Permutation Test (complete enumeration)

data: DESMIN/ACTIN WT AAV GFP vs. CRYAB R120G AAVGFP

p-value = 0.002165

alternative hypothesis: true mean s3 - mean s4 is 0

sample estimates:

mean s3 - mean s4

-1.840548

data: DESMIN/ACTIN WT AAV TFEB vs. CRYAB R120G AAVTFEB

p-value = 0.001166

alternative hypothesis: true mean s1 - mean s2 is 0

sample estimates:

mean s1 - mean s2

1.977417

22) **Figure 7D**

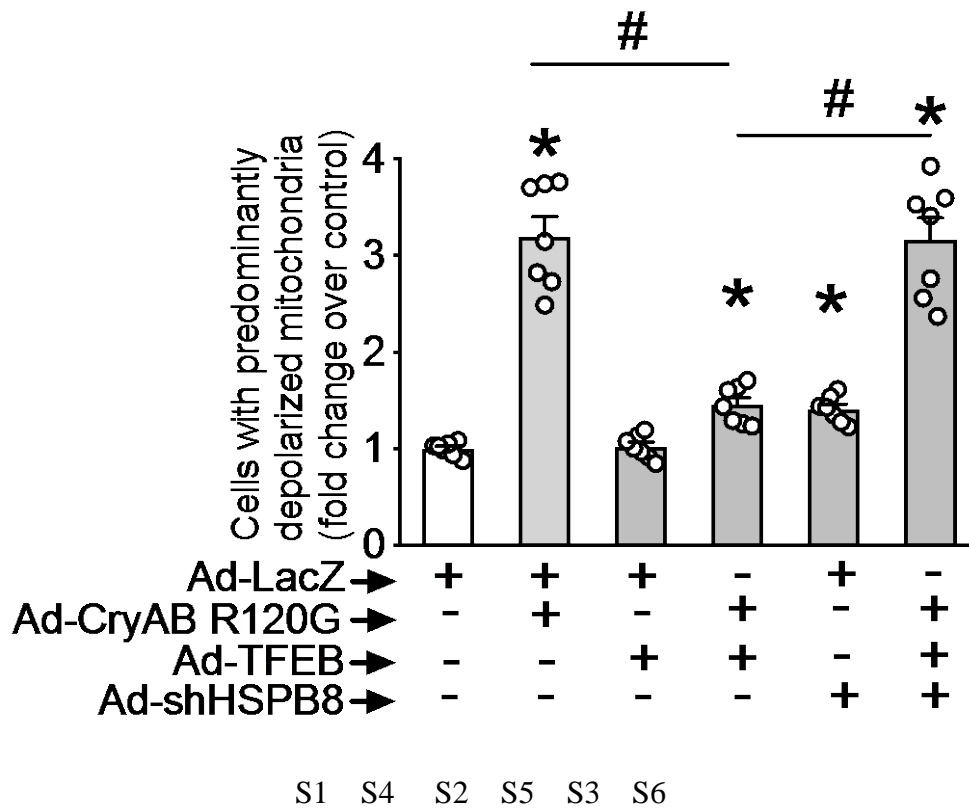

Exact Permutation Test (complete enumeration)

data: JC-1 DEPOLARIZATION: Ad LacZ + Ad CRYAB R120G vs. Ad TFEB + Ad CRYAB R120G

p-value = 0.0005828

alternative hypothesis: true mean s13 - mean s14 is 0

sample estimates:

mean s13 - mean s14

1.747366

data: JC-1 depol.: Ad TFEB + Ad CRYAB R120G vs. Ad TFEB + Ad CRYAB R120G + Ad sh-HSPB8

p-value = 0.0005828

alternative hypothesis: true mean s14 - mean s15 is 0

sample estimates:

mean s14 - mean s15

-1.709391

data: JC-1 DEPOLARIZATION: Ad LacZ vs. Ad LacZ + Ad CRYAB R120G

p-value = 0.0005828

alternative hypothesis: true mean s10 - mean s13 is 0



sample estimates:  
mean s10 - mean s13  
-2.200875

data: JC-1 DEPOLARIZATION: Ad LacZ vs. Ad TFEB + Ad CRYAB R120G  
p-value = 0.0005828  
alternative hypothesis: true mean s10 - mean s14 is 0  
sample estimates:  
mean s10 - mean s14  
-0.4535086

data: JC-1 DEPOLARIZATION: Ad LacZ vs. Ad LacZ + Ad shHSPB8  
p-value = 0.0005828  
alternative hypothesis: true mean s10 - mean s12 is 0  
sample estimates:  
mean s10 - mean s12  
-0.4109876

data: JC-1 DEPOLARIZATION: Ad LacZ vs. Ad TFEB+ AD CRYABR120G + Ad shHSPB8  
p-value = 0.0005828  
alternative hypothesis: true mean s10 - mean s15 is 0  
sample estimates:  
mean s10 - mean s15  
-2.1629

23) **Figure 7E**

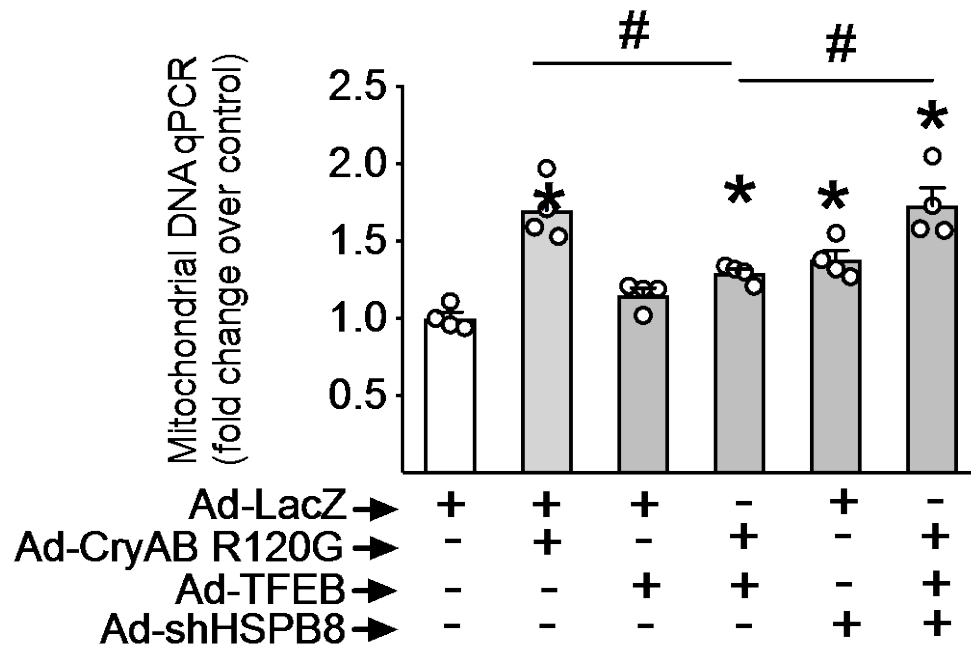

Mitochondrial DNA quantitation

Exact Permutation Test (complete enumeration)

data: MitoDNA: Ad LacZ + Ad CRYAB R120G vs. Ad TFEB + Ad CRYAB R120G

p-value = 0.02857

alternative hypothesis: true mean s13 - mean s14 is 0

sample estimates:

mean s13 - mean s14

0.4075

data: MitoDNA: Ad TFEB + Ad CRYAB R120G vs. Ad TFEB + Ad CRYAB R120G + Ad sh-HSPB8

p-value = 0.02857

alternative hypothesis: true mean s14 - mean s15 is 0

sample estimates:

mean s14 - mean s15

-0.44

data: MitoDNA: Ad LacZ vs. Ad LacZ + Ad CRYAB R120G

p-value = 0.02857

alternative hypothesis: true mean s10 - mean s13 is 0

sample estimates:

mean s10 - mean s13

-0.6975  
-2.200875

data: MitoDNA: Ad LacZ vs. Ad TFEB + Ad CRYAB R120G

p-value = 0.02857

alternative hypothesis: true mean s10 - mean s14 is 0

sample estimates:

mean s10 - mean s14

-0.29

data: MitoDNA: Ad LacZ vs. Ad LacZ + Ad shHSPB8

p-value = 0.02857

alternative hypothesis: true mean s10 - mean s12 is 0

sample estimates:

mean s10 - mean s12

-0.3775

data: MitoDNA:Ad LacZ vs. Ad TFEB+ AD CRYABR120G + Ad shHSPB8

p-value = 0.02857

alternative hypothesis: true mean s10 - mean s15 is 0

sample estimates:

mean s10 - mean s15

-0.73

24) **Figure 7F**

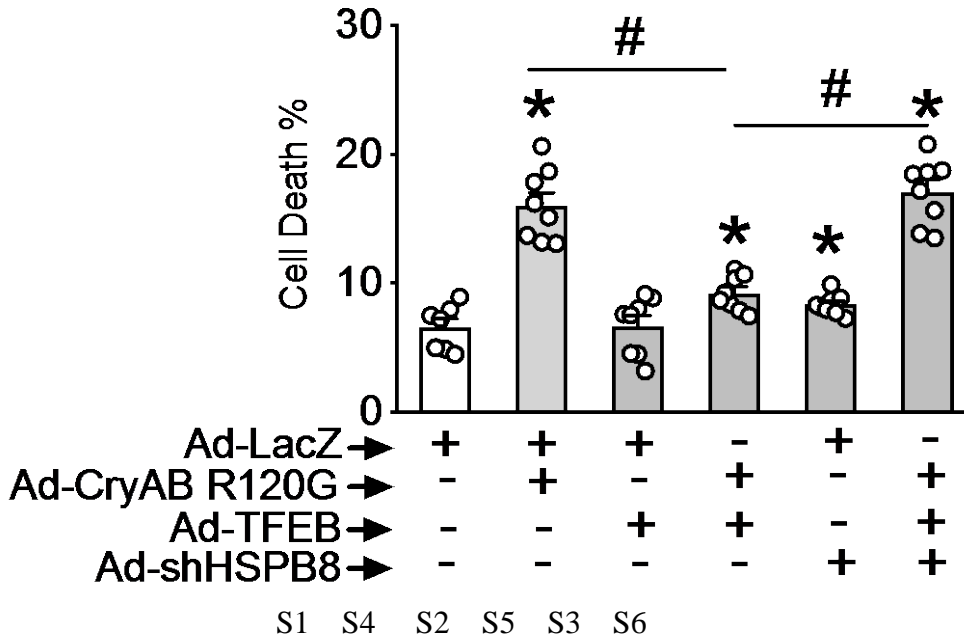

Exact Permutation Test (complete enumeration)

data: Ad LacZ + Ad CRYAB R120G vs. Ad TFEB + Ad CRYAB R120G

p-value = 0.0001554

alternative hypothesis: true mean s4 - mean s5 is 0

sample estimates:

mean s4 - mean s5

6.829617

data: Ad TFEB + Ad CRYAB R120G vs. Ad TFEB + Ad CRYAB R120G + Ad sh-HSPB8

p-value = 0.0001554

alternative hypothesis: true mean s5 - mean s6 is 0

sample estimates:

mean s5 - mean s6

-7.874323

data: Ad LacZ vs. Ad LacZ + Ad CRYAB R120G

p-value = 0.0001554

alternative hypothesis: true mean s1 - mean s4 is 0

sample estimates:

mean s1 - mean s4

-9.49469

data: Ad LacZ vs. Ad TFEB + Ad CRYAB R120G

p-value = 0.006838

alternative hypothesis: true mean s1 - mean s5 is 0

sample estimates:  
mean s1 - mean s5  
-2.665073

data: Ad LacZ vs. Ad LacZ + Ad shHSPB8  
p-value = 0.02455  
alternative hypothesis: true mean s1 - mean s3 is 0  
sample estimates:  
mean s1 - mean s3  
-1.78758

data: Ad LacZ vs. Ad TFEB+ AD CRYABR120G + Ad shHSPB8  
p-value = 0.0001554  
alternative hypothesis: true mean s1 - mean s6 is 0  
sample estimates:  
mean s1 - mean s6  
-10.5394

25) Figure 8B

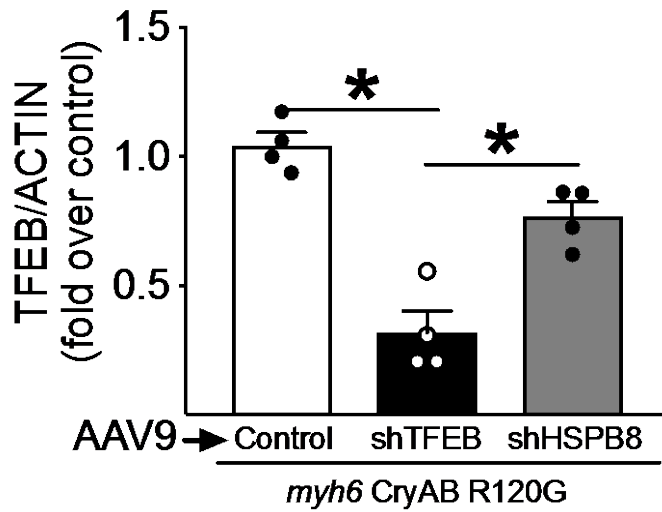

Exact Permutation Test (complete enumeration)

data: AAV sh control and sh TFEB

p-value = 0.02857

alternative hypothesis: true mean s10 - mean s11 is 0

sample estimates:

mean s10 - mean s11

0.7235474

data: sh TFEB and sh HSPB8

p-value = 0.02857

alternative hypothesis: true mean s11 - mean s12 is 0

sample estimates:

mean s11 - mean s12

-0.4478951

26) Figure 8C

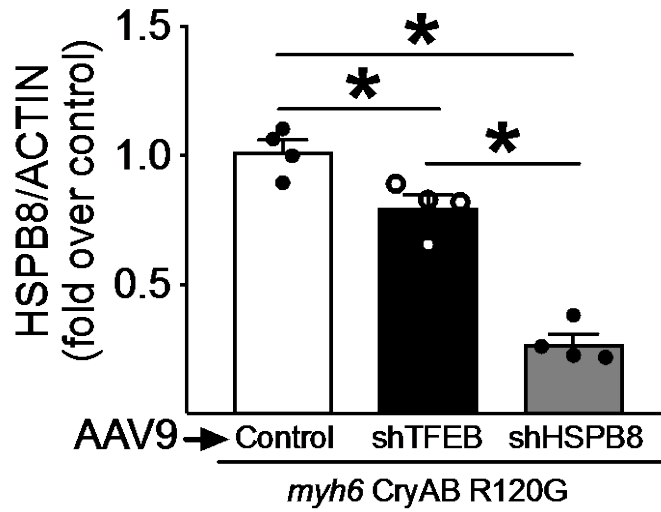

data: sh Control and sh TFEB

p-value = 0.02857

alternative hypothesis: true mean s10 - mean s11 is 0

sample estimates:

mean s10 - mean s11

0.2165965

data: sh TFEB and sh HSPB8

p-value = 0.02857

alternative hypothesis: true mean s11 - mean s12 is 0

sample estimates:

mean s11 - mean s12

0.5273424

data: sh Control and sh HSPB8

p-value = 0.02857

alternative hypothesis: true mean s10 - mean s12 is 0

sample estimates:

mean s10 - mean s12

0.743939

27) **Figure 8D**

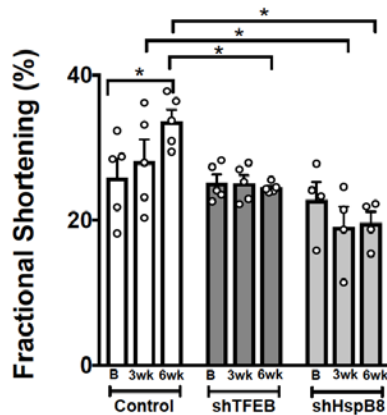

Exact Permutation Test (complete enumeration)

data: sh Control baseline and sh Control 6wk  
 p-value = 0.03968  
 alternative hypothesis: true mean s10 - mean s30 is 0  
 sample estimates:  
 mean s10 - mean s30  
 -7.7552

data: sh control baseline and shHSPB8 baseline  
 p-value = 0.07937  
 alternative hypothesis: true mean s20 - mean s21 is 0  
 sample estimates:  
 mean s20 - mean s21  
 9.0979

data: sh Control 6wk and sh TFEB 6wk  
 p-value = 0.007937  
 alternative hypothesis: true mean s30 - mean s31 is 0  
 sample estimates:  
 mean s30 - mean s31  
 14.0881

data: sh Control 6wk and sh HSPB8 6wk  
 p-value = 0.007937  
 alternative hypothesis: true mean s30 - mean s32 is 0  
 sample estimates:  
 mean s30 - mean s32  
 9.2062



### Supplemental References:

1. Godar RJ, Ma X, Liu H, Murphy JT, Weinheimer CJ, Kovacs A, Crosby SD, Saftig P and Diwan A. Repetitive stimulation of autophagy-lysosome machinery by intermittent fasting preconditions the myocardium to ischemia-reperfusion injury. *Autophagy*. 2015;11:1537-60.
2. Syed F, Diwan A and Hahn HS. Murine echocardiography: a practical approach for phenotyping genetically manipulated and surgically modeled mice. *JAmSocEchocardiogr*. 2005;18:982-990.
3. Cilvik SN, Wang JI, Lavine KJ, Uchida K, Castro A, Gierasch CM, Weinheimer CJ, House SL, Kovacs A, Nichols CG and Ornitz DM. Fibroblast growth factor receptor 1 signaling in adult cardiomyocytes increases contractility and results in a hypertrophic cardiomyopathy. *PloS one*. 2013;8:e82979.
4. Ma X, Liu H, Foyil SR, Godar RJ, Weinheimer CJ, Hill JA and Diwan A. Impaired autophagosome clearance contributes to cardiomyocyte death in ischemia/reperfusion injury. *Circulation*. 2012;125:3170-3181.
5. Tannous P, Zhu H, Johnstone JL, Shelton JM, Rajasekaran NS, Benjamin IJ, Nguyen L, Gerard RD, Levine B, Rothermel BA and Hill JA. Autophagy is an adaptive response in desmin-related cardiomyopathy. *ProcNatAcadSciUSA*. 2008;105:9745-9750.
6. Ravi V, Jain A, Ahamed F, Fathma N, Desingu PA and Sundaresan NR. Systematic evaluation of the adaptability of the non-radioactive SUnSET assay to measure cardiac protein synthesis. *Sci Rep*. 2018;8:4587.
